1 *Running title:* Ago2-seq identifies new microRNA targets for seizure control

2 *Authors:* Morten T. Venø<sup>1\*</sup>, Cristina R. Reschke<sup>2,3\*</sup>, Gareth Morris<sup>2,3,4\*</sup>, Niamh M. C.  
3 Connolly<sup>2</sup>, Junyi Su<sup>1</sup>, Yan Yan<sup>1</sup>, Tobias Engel<sup>2,3</sup>, Eva M. Jimenez-Mateos<sup>2</sup>, Lea M. Harder<sup>5</sup>,  
4 Dennis Pultz<sup>5</sup>, Stefan J. Haunsberger<sup>2</sup>, Ajay Pal<sup>2</sup>, Braxton A. Norwood<sup>6</sup>, Lara S. Costard<sup>8,9</sup>,  
5 Valentin Neubert<sup>8</sup>, Federico Del Gallo<sup>10</sup>, Beatrice Salvetti<sup>10</sup>, Vamshidhar R. Vangoor<sup>11</sup>,  
6 Amaya Sanz Rodriguez<sup>2,3</sup>, Juha Muilu<sup>12</sup>, Paolo F. Fabene<sup>10</sup>, R. Jeroen Pasterkamp<sup>11</sup>, Jochen  
7 H.M. Prehn<sup>2,3</sup>, Stephanie Schorge<sup>4</sup>, Jens S. Andersen<sup>5</sup>, Felix Rosenow<sup>8,9</sup>, Sebastian Bauer<sup>8,9\*</sup>,  
8 Jørgen Kjems<sup>1\*</sup> and David C. Henshall<sup>2,3\*#</sup>

9 \*These authors contributed equally

10 <sup>1</sup>Interdisciplinary Nanoscience Centre (iNANO) and Department of Molecular Biology and  
11 Genetics, Aarhus University, Denmark

12 <sup>2</sup>Department of Physiology and Medical Physics, Royal College of Surgeons in Ireland,  
13 Dublin, Ireland

14 <sup>3</sup>FutureNeuro Research Centre, RCSI, Dublin, Ireland

15 <sup>4</sup>Department of Clinical and Experimental Epilepsy, Institute of Neurology, University  
16 College London, London, U.K.

17 <sup>5</sup> Center for Experimental BioInformatics, University of Southern Denmark, Campusvej 55,  
18 DK-5230 Odense M, Denmark

19 <sup>6</sup>Expesicor Inc, Kalispell, USA

20 <sup>7</sup>FYR Diagnostics, Missoula, USA

21 <sup>8</sup>Epilepsy Center, Department of Neurology, Philipps University Marburg, Marburg, Germany

22 <sup>9</sup>Epilepsy Center Frankfurt Rhine-Main, Neurocenter, University Hospital Frankfurt and  
23 Center for Personalized Translational Epilepsy Research (CePTER), Goethe-University  
24 Frankfurt, Frankfurt a.M., Germany

25 <sup>10</sup>Department of Neuroscience, Biomedicine and Movement Sciences, University of Verona,

26 Verona, Italy

27 <sup>11</sup>Department of Translational Neuroscience, UMC Utrecht Brain Center, University Medical  
28 Center Utrecht, Utrecht University, Utrecht, The Netherlands

29 <sup>12</sup>BC Platforms, Finland

30

31 *Correspondence:* David C. Henshall, PhD, Department of Physiology & Medical Physics,  
32 Royal College of Surgeons in Ireland, 123 St. Stephen's Green, Dublin D02 YN77, Ireland.  
33 Ph: +353 86 059 5039; Email: [dhenshall@rcsi.ie](mailto:dhenshall@rcsi.ie)

34

35 Manuscript details: Abstract: 149 words, Figures: 6, Tables: 2, Supplementary Data: 5

36 **Abstract**

37 MicroRNAs (miRNAs) are short noncoding RNAs that shape the gene expression landscape,  
38 including during the pathogenesis of temporal lobe epilepsy (TLE). In order to provide a full  
39 catalog of the miRNA changes that happen during experimental TLE, we sequenced  
40 Argonaute 2-loaded miRNAs in the hippocampus of three different animal models at regular  
41 intervals between the time of the initial precipitating insult to the establishment of  
42 spontaneous recurrent seizures. The commonly upregulated miRNAs were selected for a  
43 functional *in vivo* screen using oligonucleotide inhibitors. This revealed anti-seizure  
44 phenotypes upon inhibition of miR-10a-5p, miR-21a-5p and miR-142a-5p as well as  
45 neuroprotection-only effects for inhibition of miR-27a-3p and miR-431-5p. Proteomic data  
46 and pathway analysis on predicted and validated targets of these miRNAs indicated a role for  
47 TGF $\beta$  signaling in a shared seizure-modifying mechanism. Together, these results identify  
48 functional miRNAs in the hippocampus and a pipeline of new targets for seizure control in  
49 epilepsy.

50

51 *Keywords:* Antisense oligonucleotide; Biomarker; Noncoding RNA; Epigenetic;

52 Epileptogenesis; Hippocampal sclerosis;

53

## 54 **Introduction**

55 Temporal lobe epilepsy (TLE) is characterized by seizures arising from or involving the  
56 hippocampus and is the most common focal epilepsy syndrome in adults <sup>1</sup>. TLE is frequently  
57 refractory to pharmacotherapy, often necessitating surgical resection of involved brain  
58 structures <sup>2</sup>. The most common pathological finding within the removed hippocampus is  
59 select neuron loss and gliosis <sup>3</sup>. Resected tissue from TLE patients also features  
60 neuroinflammation and remodeling of neuronal networks at both micro- and macroscopic  
61 scale <sup>4,5</sup>. Recent sequencing and array-based profiling of protein-coding transcripts and  
62 systems biology approaches have generated deep insights into the molecular pathophysiology  
63 and helped identify novel classes of molecule for therapeutic targeting <sup>6,7,8,9</sup>.

64 MicroRNAs (miRNAs) are critical for shaping the gene expression landscape in the brain  
65 <sup>10</sup>. They are short noncoding RNAs that primarily function post-transcriptionally, conferring  
66 precision to cellular protein fluctuations <sup>11,12</sup>. Biogenesis of miRNAs involves nuclear  
67 processing of a primary transcript followed by terminal loop-processing in the cytoplasm,  
68 resulting in a miRNA duplex from which one strand is selected by an Argonaute (Ago)  
69 protein <sup>13</sup>. Argonaute-2 (Ago2) is critically important for miRNA function, enriched in the  
70 hippocampus and, uniquely among Ago proteins, can directly cleave target RNAs <sup>14</sup>. After  
71 miRNA loading and the formation of a RNA-induced silencing complex (RISC), potential  
72 mRNA targets are selected through imperfect base pairing between miRNA and mRNA <sup>15</sup>.  
73 Upon identifying regions of sufficient complementarity, typically 7 – 8 nt matches between  
74 the miRNA and the 3' untranslated region of the target mRNA, the RISC recruits further  
75 proteins, leading to translational repression or mRNA decay <sup>16</sup>. Individual miRNAs often  
76 have multiple targets, increasing the scope for influencing several pathways or enhanced  
77 regulation of single pathways by multiple miRNAs, which may be an advantage for the  
78 treatment of TLE <sup>11,12</sup>.

79 Spatio-temporal changes to miRNA expression have been reported in the hippocampus  
80 following epileptogenic brain injuries and these persist in established epilepsy<sup>17,18</sup>. In  
81 parallel, *in vivo* deployment of oligonucleotide miRNA inhibitors (antagomirs) has  
82 demonstrated functional roles for a few miRNAs in seizure control and epileptogenesis<sup>19,20</sup>.  
83 It remains unknown how many more miRNAs may be suitable targets in epilepsy. Recent  
84 efforts have identified miRNAs dysregulated in TLE<sup>21,22,23</sup> but no study to date has focused  
85 on quantifying the amounts of functional Ago2-loaded miRNAs that are shared between TLE  
86 models. This is important since the specific enrichment for Ago2-loaded miRNAs provides  
87 greater coverage of the miRNA landscape and better predicts the regulatory potential of  
88 miRNAs<sup>24</sup>.

89 Here, we performed small RNA sequencing of Ago2-loaded miRNAs from three different  
90 animal models across all phases of epilepsy development in two rodent species. Based on this  
91 resource, we deployed an *in vivo* antagomir screen and identified several novel anti-seizure  
92 and neuroprotective phenotypes among miRNAs that were up-regulated across the three  
93 models. Pathway analysis suggests TGF $\beta$  signaling as a potential overlapping mechanism  
94 shared between the target miRNAs. Our systems-level approach identifies an extensive class  
95 of miRNAs that may prove targetable for the treatment of seizures in human TLE.

96

97

## 98 **Results**

99 *Ago2-seq provides a quantitative catalog of functionally-engaged miRNAs in experimental*  
100 *TLE*

101 To identify shared functionally-engaged miRNAs at each phase of epilepsy development, we  
102 performed Ago2-immunoprecipitation followed by small RNA sequencing on hippocampal  
103 samples from three different rodent models of TLE in two species under continuous

104 electroencephalogram (EEG) monitoring, sampling tissue at six time-points (intra-amygdala  
105 kainic acid (IAKA): N = 18 treated and 18 vehicle control; pilocarpine (PILO): N = 18 treated  
106 and 18 vehicle control; perforant path stimulation (PPS): N = 21 treated and 3 non-stimulated  
107 control, total N = 96; Figure 1A, Supplementary Data 1 and see *Methods*). This generated  
108 1.44 billion small RNA reads of which up to 82% were miRNAs, with over 400 unique  
109 miRNAs detected per model (Figure 1B, Supplementary Data 2). There was exceptionally  
110 high concordance for levels among the most abundant miRNAs, with sequencing reads often  
111 differing by as little as 1 % across the three models (Figure 1C).

112 Induction of epilepsy led to significant changes in the abundance of approximately half of  
113 the detected miRNAs in the hippocampus in each model (Figure 2A and Supplementary Data  
114 3). Expression changes showed disease stage-specific differences for individual miRNAs,  
115 including up- and down-regulation shortly after epileptogenic insult, on the day of first  
116 spontaneous seizure and chronic epilepsy, indicating that all phases of epilepsy development  
117 are associated with specific miRNA changes (Figure 2A, B, C). For miRNAs that originate  
118 from the same primary transcript, expression levels of miRNAs within the cluster often  
119 followed similar patterns (Figure 2C).

120 Next, we identified shared dysregulated (differential expression >25%) miRNAs across the  
121 three models, excluding low-abundance (<10 RPM) miRNAs for all time-points analysed  
122 (Figure 3A). Within the chronic epilepsy phase, the period most relevant to how a miRNA-  
123 based therapeutic might be used clinically (i.e. treating patients with pre-existing, refractory  
124 epilepsy)<sup>17</sup>, we found eight up- and one down-regulated miRNAs common to all three models  
125 (Figure 3B,C). This included miR-132-3p and miR-146a-5p, for which there is already  
126 significant functional data linking them to epilepsy<sup>25, 26, 27, 28</sup>, and six miRNAs (miR-10a-5p,  
127 miR-21a-3p, miR-27a-3p, miR-142a-5p, miR-212-3p and miR-431-5p) for which there is  
128 limited or no functional *in vivo* data linking to epilepsy (Figure 3C).

129 *In vivo antagomir screening identifies three anti-seizure phenotypes*

130 We hypothesized that the up-regulated miRNAs shared in the chronic epilepsy phase across  
131 the three models would be enriched for regulators of brain excitability. To test this, we  
132 assessed seizure responses after *in vivo* knock-down of miRNAs using locked nucleic acid  
133 (LNA)-modified oligonucleotide miRNA inhibitors (antagomirs). We excluded miR-132-3p  
134 and miR-146a-5p to prioritize miRNAs not previously linked to epilepsy, and excluded miR-  
135 21a-3p because it is not fully conserved in humans therefore limiting translational potential.  
136 Instead we selected the fully conserved miR-21a-5p, which also satisfied basal expression  
137 criteria and upregulation (at least 15%) in all three models. Mice received an  
138 intracerebroventricular injection of one of six targeting antagomirs, a scrambled antagomir or  
139 vehicle (PBS) 24 h before induction of status epilepticus by an intraamygdala microinjection  
140 of kainic acid (Figure 4A). This procedure ensures an optimal miRNA knockdown at the time  
141 of testing seizure responses<sup>29</sup>. EEG recordings were used to assess seizure severity and brains  
142 were later processed to quantify irreversible hippocampal damage<sup>29</sup>.

143 Seizure severity, as determined by analysis of EEG total power<sup>29</sup>, was significantly reduced  
144 during status epilepticus in mice pre-injected with antagomirs against miR-10a-5p, miR-21a-  
145 5p and miR-142a-5p (Figure 4B,C). Seizure burden, determined by measuring only ictal  
146 epileptiform activity<sup>29</sup>, was significantly reduced by the same antagomirs and was also  
147 significant for anti-miR-431-5p (Figure 4D). Analysis of the brains from mice killed 24 h  
148 after status epilepticus revealed significant neuroprotection for 5/6 of the antagomirs (those  
149 targeting miRNAs -10a-5p, -21a-5p, -27a-5p, -142a-5p and -431-5p), relative to controls  
150 (Figure 4E, F). These results suggest that a high proportion of the shared miRNAs  
151 upregulated in the chronic phase of experimental epilepsy may be mal-adaptive, contributing  
152 to enhanced network excitability and neuronal damage. Consequently, their targeting may  
153 offer novel approaches to seizure control.

154

155 *Knockdown of miR-10a-5p, -21a-5p and -142a-5p has limited biophysical and functional*  
156 *effects in naïve brains*

157 Current anti-seizure drugs are associated with side effects including drowsiness that arise  
158 because of non-specific dampening of brain excitability<sup>1,2</sup>. To assess whether this was a risk  
159 for any of the antagomirs, we focused on the miRNAs which showed the most robust anti-  
160 seizure phenotypes when targeted (miR-10a-5p, miR-21a-5p and miR-142a-5p). We  
161 conducted a range of behavioral and electrophysiological assessments, originally developed  
162 for antagomir-injected rats,<sup>30</sup> to report on possible adverse effects of miRNA inhibition *in*  
163 *vivo*. Performance of rats injected with each of the three antagomirs was normal in the novel  
164 object location test, although anti-miR-21a-5p caused a non-significant reduction in object  
165 discrimination (Figure 5A). We next prepared *ex vivo* brain slices from the same rats 2-4 days  
166 after antagomir injection, to coincide with maximal miRNA knockdown<sup>29</sup>. Multiple  
167 electrophysiological measurements were normal in antagomir-injected animals including field  
168 response to Schaffer collateral stimulation (Figure 5B), paired pulse facilitation (Figure 5C)  
169 and pyramidal neuron biophysical properties (Figure 5D). We also stained hippocampal tissue  
170 sections for pre- and post-synaptic marker proteins. Immunofluorescent staining revealed that  
171 depletion of miR-142a-5p selectively reduced the size of the glutamatergic pre-synaptic  
172 marker VGLUT1, with no effect of the post-synaptic marker PSD-95. Anti-miR-10a-5p and  
173 anti-miR-21a-5p had no effect on either marker (Figure 5E). Taken together, these studies  
174 indicate that the anti-seizure antagomirs have no deleterious effects on hippocampal  
175 properties in naïve animals.

176

177

178



179 *Convergence of targets and pathways regulated by the miRNAs*

180 To investigate potential mechanisms of the seizure-modifying antagomirs, we developed a  
181 new miRNA-target interaction (MTI) database and focused on identifying convergent  
182 pathways for miR-10a-5p, miR-21a-5p and miR-142a-5p. The putative mRNA targets of the  
183 three miRNAs were identified using both predicted (miRDIP)<sup>31</sup> and experimentally validated  
184 (miRTarBase<sup>32</sup> TarBase<sup>33</sup>) datasets. To reduce the risk of false-positives, we applied strict  
185 MTI filtering conditions based on miRDIP-assigned confidence levels and type of  
186 experimental validation (see Methods). The estimated MTIs for each miRNA, along with  
187 brain expression information for each putative target, are listed in Supplementary Data 4.  
188 While each miRNA had many unique targets, the three seizure-related miRNAs (miR-10a-5p,  
189 miR-21a-5p and miR-142a-5p) shared 59 mRNA targets (Figure 6A, Table 1). Interestingly,  
190 SLC17a7 (VGLUT1) was predicted as a high confidence target of miR-142a-5p, in line with  
191 our experimental data (Figure 5F). 19 of the shared mRNA targets, including PTEN, were not  
192 targeted by miR-27a-3p or miR-431, indicating that these targets could be specific to the  
193 observed seizure-modifying effects (Figure 6A, Table 1). Moreover, 48 mRNAs targeted  
194 by >1 of the seizure-modifying miRNAs (of a total 525) have previously been associated with  
195 epilepsy, including GABA receptor, sodium, and potassium channel subunits (Table 2). *In*  
196 *situ* hybridization for miR-10a-5p, miR-21a-5p and miR-142a-5p suggested neuronal as well  
197 as glial expression, consistent with these targets (Supplementary Data 5).

198 We next performed Reactome pathway enrichment analysis on the predicted targets for  
199 each of the miRNAs, using targets expressed in the hippocampus, and found that 15 pathways  
200 were enriched for targets of >1 seizure-modifying miRNA (Figure 6B). Notably, six of these  
201 pathways are associated with TGF $\beta$  signaling, including the two pathways enriched in targets  
202 of all three miRNAs ('R-HSA-170834: Signaling by TGF-beta Receptor Complex' and its  
203 daughter pathway 'R-HSA-2173793: Transcriptional activity of SMAD2/SMAD3:SMAD4

204 heterotrimer'). On further investigation, we noted that 35/73 genes involved in these two  
205 pathways are targeted by at least one of the seizure-modifying miRNAs (Figure 6C). Four of  
206 these mRNAs have been previously implicated in epilepsy, including Ubiquitin specific  
207 peptidase 9, X-linked (USP9X)<sup>34</sup>, a gene targeted by all three miRNAs. To corroborate these  
208 systems-level predictions, we performed mass spectrometry proteomic analyses on rat  
209 hippocampi isolated at the chronic time-point of the PPS model. This identified significant  
210 changes in the expression of multiple proteins involved in TGF $\beta$  signaling. The main changes  
211 observed were down-regulation in the range of 0.7-0.9 FC (Figure 6D). This is consistent with  
212 the actions of miRNAs to fine tune protein levels of targets in the same pathway. Five of the  
213 seven significantly ( $p < 0.01$ ) downregulated proteins in the TGF $\beta$  signaling pathway,  
214 including Usp9x, are targeted by one or more of the three identified miRNAs as depicted in  
215 Figure 6C. Taken together, these results identify potential convergent miRNA target pathways  
216 underlying the anti-seizure effects of the miRNAs identified using functional screening across  
217 three *in vivo* animal models.

218

219

## 220 **Discussion**

221 In the present study, we provide a comprehensive catalog of functional miRNA expression in  
222 the mouse and rat hippocampus and the changes that occur upon induction of epilepsy across  
223 three different models. Using this resource and an *in vivo* antagomir screening assay, we  
224 demonstrate that miRNAs that show consistent changes after spontaneous recurrent seizures  
225 in all three models are a rich source of targets for seizure modification. Intracerebral injection  
226 of anti-seizure antagomirs did not disrupt normal hippocampal functions. Finally, we provide  
227 evidence for pathways by which dysregulation of these miRNA may generate brain

228 hyperexcitability. Together, these studies demonstrate how a systems-level approach can  
229 identify novel miRNA targets for the treatment of acute seizures or epilepsy.

230 By regulating the gene expression landscape and through their multi-targeting actions,  
231 miRNAs exert important effects on the excitable properties of neuronal networks underlying  
232 brain function<sup>10</sup>. By extension, miRNAs represent potential targets for seizure control or  
233 disease-modification in epilepsy<sup>17</sup>. The existence of conserved miRNA signatures in the  
234 development and maintenance of a seizure-prone state would provide important mechanistic  
235 insights and guide prioritization of miRNAs for therapeutic targeting. Here we undertook a  
236 coordinated effort, sequencing Ago2-bound miRNA to more accurately predict the regulatory  
237 potential of a given miRNA than by measuring overall miRNA levels in a sample<sup>24</sup>, covering  
238 three different models, two species and all stages from the initial precipitating insult to  
239 establishment of spontaneous recurrent seizures. The dataset contains robust statistics and fold  
240 change for individual miRNAs at each time point to illustrate expression variance and cross-  
241 model and cross-species comparisons. We found high concordance between the models and  
242 species in expression of known brain-enriched miRNAs, including miR-128-5p<sup>35</sup> and  
243 members of the let-7-family<sup>36</sup> whereas no reads were detected for non-brain miRNAs such as  
244 miR-122-3p (liver-specific) and miR-208b-3p (heart-specific)<sup>37,38</sup>. The dataset features  
245 expected changes to neuronal activity-regulated miRNAs including miR-132-3p<sup>25</sup> and  
246 miRNAs that regulate cellular responses to tissue injury, such as apoptosis-associated miR-  
247 34a-5p<sup>39,40</sup>. Together, the results offer important advances over previous work which focused  
248 on predetermined miRNAs (e.g. microarray-based), lacked quantitative information on  
249 relative abundance and lacked functional relevance (non-Ago2-loaded miRNAs)<sup>21, 25, 41, 42, 43,</sup>  
250 <sup>44, 45</sup>. The Ago2-seq data provided in the current study are also an important companion to  
251 other databases on miRNA-epilepsy associations<sup>46</sup>. The data complement, as well as reveal  
252 distinct profiles from, Ago2-seq analysis of neural precursors<sup>47</sup> and should interest

253 researchers working on disease mechanisms for which there is shared pathophysiology, such  
254 as traumatic brain injury <sup>48</sup>.

255 By employing a multi-model sequencing approach, we were able to demonstrate that there  
256 are shared miRNAs dysregulated at all phases in the development of epilepsy, up to and  
257 including the period of active chronic epilepsy. Most of the miRNA changes fell within a 1.5  
258 – 3 fold range although some, including miR-142a-5p, displayed much larger fold changes.  
259 There was no apparent species or model-specific bias and numbers of shared miRNAs at the  
260 different stages of epilepsy development were quite similar, ranging from 6 - 18 among up-  
261 regulated miRNAs. We detected previously reported changes to miRNAs functionally linked  
262 to experimental epilepsy, including miR-22-3p <sup>49</sup>, miR-129-5p <sup>50</sup>, miR-134-5p <sup>25</sup>, miR-146a-  
263 5p <sup>27</sup> and miR-324-5p <sup>51</sup>. This indicates that Ago2-seq identifies robust miRNAs for targeting,  
264 a means to cross-compare between species and model, and a way to better prioritize miRNAs  
265 for functional assessment. A number of the miRNAs reported to be dysregulated in human  
266 TLE <sup>52, 53, 54</sup> were also differentially expressed in the chronic epilepsy state. This underscores  
267 the clinical relevance and translatability of our findings. It also invites additional predictions  
268 about human-dysregulated miRNAs which might be tested for function in animal models. The  
269 results extend evidence of a common miRNA signature in experimental epileptogenesis <sup>23</sup>,  
270 contrasting conclusions from certain meta-analyses <sup>22</sup>. Moreover, we report higher numbers of  
271 miRNAs and more differentially expressed miRNAs across these animal models than any  
272 previous epilepsy profiling study <sup>21, 25, 41, 42, 43, 44, 45</sup>, indicating that miRNA dysregulation may  
273 impact on gene expression even more extensively than previously thought <sup>17</sup>.

274 The potential for a miRNA-based therapeutic is gaining traction for disease modification in  
275 epilepsy <sup>5, 17</sup>. LNA-based oligonucleotides as used here are particularly relevant for clinical  
276 translation as this backbone chemistry has been used in human trials of a miRNA-based  
277 therapy for hepatitis C <sup>55</sup>. Here we show that robust anti-seizure and neuroprotective effects

278 can be achieved by targeting multiple miRNAs commonly upregulated at the stage of chronic  
279 epilepsy. Notably, this included miRNAs for which there was no prior knowledge of a  
280 functional link to epilepsy. Our unbiased screen for anti-seizure phenotypes identified five  
281 antagomirs that protect the brain against prolonged seizures, of which those targeting miR-  
282 10a-5p, miR-21a-5p and miR-142a-5p had the most robust effects. This is a substantial  
283 addition to the number of miRNAs reported as potential targets for seizure control <sup>20</sup>. It also  
284 suggests that many of the upregulated miRNAs in the chronic epilepsy phase may be  
285 suppressing targets that would otherwise oppose hyperexcitability. While the anti-seizure  
286 effects of targeting miR-10a-5p, miR-142a-5p and the neuro-protection associated with  
287 inhibition of miR-431-5p are novel, a recent study also found that targeting miR-21-5p could  
288 suppress seizures <sup>56</sup>. Notably, our behavioral tests and biophysical analyses of the  
289 electrophysiological properties of hippocampus from antagomir-treated rodents showed no  
290 obvious impairments, indicating broad safety and suitability to enter preclinical development.

291 The regulatory potential of miRNAs is enhanced where there is convergence upon a small  
292 number of targets or pathways <sup>11,12</sup>. An important effort in the present study was to combine  
293 mRNA targets of all miRNAs (experimentally validated and predicted interactions) to build  
294 superior pathways, building in a high confidence threshold for target predictions. We found  
295 that mRNA targets of the three seizure-regulating miRNAs shared TGF $\beta$  and related SMAD  
296 signaling pathways as a potential overlapping seizure-modifying mechanism, while analyses  
297 at the protein level corroborated this pathway-level effect. This highlights that miRNA  
298 effects, while diverse at the level of individual miRNAs, can converge on common signaling  
299 pathways to exert complementary effects. TGF $\beta$ -signaling is known to be involved in  
300 epileptogenesis <sup>57</sup>, and the seizure-suppressive effects of losartan, an AT1 receptor antagonist,  
301 are potentially mediated through TGF $\beta$ -signaling <sup>58</sup>. Other overlapping targets included ion  
302 channels and PPAR $\alpha$ -signaling pathways. Furthermore, several of the genes targeted by two

303 or all three of the seizure-regulating miRNAs have previously been implicated in epilepsy.  
304 This includes USP9X<sup>34</sup> which is targeted by all three seizure-regulating miRNAs, was down-  
305 regulated in our proteomics analysis, and is also a component of the TGF $\beta$ -signaling pathway.  
306 However, the unique advantage of targeting miRNAs is the fact that by their nature of action,  
307 multiple genes within these signaling pathways are targeted.

308 There are some limitations and assumptions to consider in the present study. Some of the  
309 Ago2-bound miRNA pool may not be actively engaged with mRNA targets<sup>59</sup>, Ago isoforms  
310 besides Ago2 may be important<sup>14</sup> and small RNA sequencing may over- or under-estimate  
311 the abundance of certain miRNA species<sup>60</sup>. The use of already-epileptic animals, in which the  
312 target miRNA level would be increased, could have yielded larger effect sizes in our  
313 functional screen. While we restricted our functional studies to upregulated miRNAs, it is  
314 likely that seizure-regulating miRNAs are present among the downregulated miRNAs<sup>23</sup>.  
315 Finally, adjustment of criteria for selecting miRNAs could yield additional miRNAs for  
316 functional studies. Indeed, several potentially new epilepsy-associated miRNAs not identified  
317 in multi-model or meta-analyses of miRNAs<sup>21, 22, 23</sup> showed significant up- or down-  
318 regulation in two of the models here including highly-expressed miRNAs (thus likely to be  
319 functionally significant) such as miR-410-3p and miR-434-3p (down-regulated) and miR-24-  
320 3p and miR-127-3p (up-regulated) .

321 In summary, the present study generated a unique resource to explore the expression and  
322 dysregulation of miRNAs across multiple animal models of epilepsy and throughout the  
323 course of the disease. This systematic approach to discovery revealed a greater than  
324 previously anticipated, temporally-specific dysregulation of miRNAs in epilepsy and showed  
325 this to be a rich source of seizure-regulatory miRNA targets. We identified multiple additional  
326 miRNA targets for seizure control as well as identified potential mechanistic pathways.  
327 Together, these results reinforce and extend the evidence that miRNAs are a major class of

328 regulatory element in epilepsy with therapeutic potential for seizure control.

329

## 330 **Methods**

### 331 *Animal models of epilepsy*

332 All animal experiments were performed in accordance with the European Communities Council  
333 Directive (2010/63/EU). All animals were housed in on-site barrier-controlled facilities having  
334 a 12 h light-dark cycle with ad libitum access to food and water.

335 Procedures in rats were approved by the local regulation authority (for Philipps University  
336 Marburg, Germany: Regierungspraesidium Giessen, 73/2013), or according to the Animals  
337 (Scientific Procedures) 1986 Act (UK). Male Sprague-Dawley rats (325–350 g; Charles River,  
338 Germany or 200-300 g; Harlan, UK) were used in all studies. Epilepsy was induced using the  
339 perforant pathway stimulation (PPS) model in rats, as described<sup>61</sup>. Animals received  
340 buprenorphine (0.2 mg/kg s.c.) and were anesthetized (isoflurane; 5% induction, 2-3%  
341 maintenance). Drill holes were prepared for electrode implantation and 3 fixing screws. An  
342 EEG transmitter (A3028E, Open Source Instruments, Inc., Watertown, MA, USA) was  
343 implanted into a skin pouch prepared at the left abdominal site of the rat. Stimulation electrodes  
344 (diameter 0.125 mm, Plastics One, Roanoke, VA, USA) were implanted bilaterally into the  
345 angular bundle of the PP (AP: immediately rostral of the lambdoid suture, ML: +/- 4.5 mm  
346 lateral of the sagittal suture). Recording electrodes (diameter 0.25 mm, Plastics One, Roanoke,  
347 VA, USA) were implanted bilaterally into the DG (coordinates: 3.0 mm caudal from Bregma,  
348 +/-2.0 mm lateral from the sagittal suture). In order to determine the optimal dorso-ventral (DV)  
349 positioning of recording and stimulation electrodes, stimuli of 20 V at 0.5 Hz were applied with  
350 0.5 Hz via the stimulation electrodes during implantation, and evoked potentials were recorded  
351 from the DG. Plastic connectors joined the electrodes with stimulation/recording equipment.  
352 After surgery, rats were allowed 1 week of recovery before PPS was initiated. The PPS protocol  
353 utilized a paradigm designed to evoke and maintain hippocampal seizure activity throughout  
354 the stimulation, but not convulsive status epilepticus<sup>61</sup>, which consisted of continuous, bilateral



355 2 Hz paired-pulse stimuli, with a 40 ms interpulse interval, plus a 10 second train of 20 Hz  
356 single-pulse stimuli delivered once per minute, generated by a S88 stimulator (Grass  
357 Instruments, West Warwick, USA). All pulses (0.1 ms duration) were delivered at 15-20 V.  
358 PPS was applied for 30 min on two consecutive days and for 8 h on the third day. As described  
359 previously, animals required only isoflurane (but no benzodiazepines or other injectable drugs)  
360 to terminate seizure activity which occurred occasionally immediately after the end of PPS<sup>61</sup>.  
361 Video and EEG were recorded continuously for up to 3 months. EEG recordings were  
362 performed with an Octal Data Receiver (A3027, Open Source Instruments, Inc., Watertown,  
363 MA, USA) with a sampling rate of 512 Hz. Data were recorded in NDF (Neuroscience Data  
364 Format) and converted to EDF (European Data Format) for visual analysis with EDFbrowser  
365 (version 1.57). Video recording was performed with infrared cameras (IC-7110W, Edimax  
366 Technology, Willich, Germany) and sampled with the SecuritySpy software (Ben Software  
367 Ltd., London, UK). The total EEG of all rats was screened visually for appearance of seizure  
368 patterns by experienced reviewers (LC, VN, BN, SB). In accordance with clinical practice in  
369 epileptology, seizure patterns were defined as rhythmic activity of at least 10 s which clearly  
370 broke background activity, contained epochs of high frequency spikes or spike-wave-  
371 complexes, and showed an evolution in frequency and amplitude. Video was used to clarify  
372 appearance of artefacts (e.g. chewing, scratching). Rats were killed under deep anesthesia  
373 (xylazine+ketamine) by transcardial perfusion with ice-cold 0.9 % NaCl solution at the  
374 following time points: 1 h, 24 h, 72 h, 10 d and 16 d after induction of epilepsy via PPS  
375 (epileptogenesis); within 1 d after the first spontaneous seizure (early epilepsy); 1 month after  
376 the first spontaneous seizure (chronic epilepsy). Control rats were killed on day 17 after surgery  
377 (corresponding to day 10 after PPS in the epilepsy group). Hippocampi were rapidly removed  
378 and snap frozen at -80 °C.

379 Procedures for inducing epilepsy using the intraamygdala kainic acid (IAKA) technique in  
380 mice were approved by the Research Ethics Committee of the Royal College of Surgeons in  
381 Ireland (REC-842), under license from the Health Products Regulatory Authority  
382 (AE19127/001), Dublin, Ireland. Adult male C57BL/6 mice (20 – 25 g, Harlan) were used, as  
383 described <sup>62</sup>. Mice were anesthetized (isoflurane; 5% induction, 1–2% maintenance) and  
384 equipped for continuous EEG and video recordings using implantable EEG telemetry devices  
385 (Data Systems International). Transmitters (model F20-EET) which record bilateral EEG from  
386 the skull were implanted in a subcutaneous pocket at the time of cannula placement (on the dura  
387 mater following coordinates from bregma; IA: AP = -0.95 mm, L = +2.85 mm, V = 3.1 mm).  
388 The behavior of the animals was recorded using a video camera placed next to the cage.  
389 Continuous video-EEG data were acquired for each animal. After transmitter-cannula fitting,  
390 mice underwent intra-amygdala microinjection of kainic acid (IAKA; 0.3 µg in 0.2µl; Sigma-  
391 Aldrich, Ireland) to induce status epilepticus followed by intraperitoneal lorazepam (8 mg/kg)  
392 after 40 min to reduce morbidity and mortality. Mice were killed at 1 h, 24 h, 48 h, 72 h, the  
393 day of first spontaneous seizure (typically 3 – 5 d after status epilepticus) or at 2 weeks (chronic  
394 epilepsy). At the time of euthanasia, mice were deeply anesthetised with phenobarbital and  
395 transcardially perfused with ice-cold PBS to remove blood contaminants. Brains were rapidly  
396 removed and the entire hippocampus frozen and stored at -80°C.

397 Procedures for inducing epilepsy using the pilocarpine (PILO) model in mice were  
398 approved by the University of Verona research ethics committee under license from the Italian  
399 Ministry of Health (27/2014-PR). Adult male NMRI mice (Harlan) were fitted for DSI  
400 telemetry as above. After recovery, animals were given methylscopolamine (1 mg/kg) to block  
401 peripheral cholinergic actions and then after 30 min, given pilocarpine (300 mg/kg). Mice were  
402 and killed at 1 h, 24 h, 48 h, 72 h, the day of first spontaneous seizure (typically 1 -2 w after

403 status epilepticus) or at 4 weeks (chronic epilepsy). Euthanasia and tissue preparation was as  
404 described above.

405

406 *Immunoprecipitation of Ago2, RNA extraction and sequencing (Ago2-seq)*

407 Frozen hippocampi were allowed to thaw on ice. Thawed tissue was homogenised in 200 µl of  
408 IP buffer (300 mM NaCl, 5mM MgCl<sub>2</sub>, 0.1% NP-40, 50mM Tris-HCl pH 7.5, protease and  
409 RNase inhibitors) using plastic homogenising sticks until the tissue was completely  
410 homogenised. The homogenate was centrifuged at 16,000 g for 15 min at 4 °C to pellet nuclei  
411 and membranes. Supernatant (considered total cell lysate) was transferred to a clean Eppendorf  
412 tube. Bradford assay was performed to quantify protein content of total cell lysate. The lysate  
413 was pre-cleared by adding 10 µl of 50% Protein A/G beads (Santa Cruz Biotechnology,  
414 Germany) to 400 µg of protein lysate, final volume was adjusted to 1 ml using IP buffer and  
415 lysate was incubated rotating for 1 hour at 4 °C then centrifuged at 13,000 g for 5 min at 4°C  
416 to pellet the beads and supernatant was transferred to a new Eppendorf tube. 5 µg (5 µl of AGO-  
417 2 Cell Signalling Cat. #2897) antibody was added to pre-cleared cell lysate, vortexed and  
418 incubated rotating overnight at 4 °C. 20 µl of 50% A/G agarose beads were added to lysate-  
419 antibody solution and incubated rotating for 2 hours at 4 °C then centrifuged at 16,000 g for 15  
420 min at 4°C and supernatant removed. The pellet was washed twice with 500 µl IP buffer by  
421 gently resuspending pellet, centrifuging at 16,000 g for 1 min at 4 °C and removing supernatant.  
422 Trizol RNA purification was performed after which pelleted RNA was dissolved in 12 µl dH<sub>2</sub>O  
423 and heated to 60 °C for 10 min. Purified RNA was stored at -80 °C until small RNA library  
424 preparation. 5 µl of purified RNA was prepared using TruSeq small RNA library preparation  
425 kit (Illumina), for rat samples using standard procedure and 12 PCR cycles, for mouse using  
426 half the amount of primers and reagents and 15 PCR cycles. Pippin prep (Sage Science) was  
427 used to size fractionate libraries to 140bp - 160bp size range. Library size and purity was

428 validated on a Bioanalyzer 2100 (Agilent) using High Sensitivity DNA chip and the  
429 concentration was quantified using KAPA Library Quantification Kit. Prepared libraries were  
430 pooled as required and sequenced on a NextSeq500 (Illumina) at Exiqon.

431

#### 432 *Analysis of small RNA sequencing data*

433 FASTX-Toolkit was used to quality filter reads and cutadapt was used to remove adaptor  
434 sequences. Filtered reads were mapped using Bowtie to a list of datasets. First, reads were  
435 mapped to miRNAs from miRBase v21 allowing zero mismatches, but allowing for non-  
436 templated 3' A and T bases. Reads not mapping to miRNAs were mapped against other relevant  
437 small RNA datasets: piRNA, tRNA, snRNA, snoRNA and Y RNA allowing one mismatch. The  
438 remaining unmapped reads were mapped to mRNA and rRNA datasets. MiRNAs were  
439 normalized as reads per million miRNA mapping reads (RPM). Statistical significance was  
440 calculated by One-Way ANOVA with FDR (Benjamini-Hochberg).

441 Common-to-all miRNAs were defined as having mean basal expression above 10 RPM, while  
442 exhibiting same-directional expression change of 25% or higher in all three models at key time  
443 points in each model. The time-points were: 1 h after induction of status epilepticus, 24 h (early  
444 epileptogenesis, in all models), latent period (72 h in IAKA and PILO models, 16 days in PPS  
445 model), day of first spontaneous seizure (DOFS; within the first 24 h of a first spontaneous  
446 seizure occurring), chronic epilepsy (2 weeks in the IAKA model, 4 weeks in the PILO model  
447 and 1 month in the PPS model). This approach allows for selection of miRNAs with similar  
448 expression trends in all three models at key functional periods. These common-to-all miRNAs  
449 are a strong vantage point for further validation.

450

451

452

453 *Systematic antagomir screening*

454 Antagomir screening was performed in the IAKA mouse model according to previously  
455 described techniques<sup>63</sup>. Mice were anesthetized and prepared with an additional guide cannula  
456 for intracerebroventricular antagomir injection (ICV: AP = +0.3 mm, L = +0.9 mm, V = 1.35  
457 mm; from Bregma). Skull-mounted recording electrodes were placed and fixed with dental  
458 cement for EEG recordings. After recovery, mice were ICV injected with 0.5 nmol/2  $\mu$ l of  
459 locked nucleic acid (LNA) oligonucleotide targeting: miR-10a-5p, miR-21a-5p, miR-27a-3p,  
460 miR-142a-5p, miR-212-3p or miR-431-5p. Control animals received a non-targeting scrambled  
461 version of the antagomir or PBS. Twenty-four hours later mice were connected to the lead  
462 socket of a swivel commutator, which was connected to an EEG (Grass TwiN digital EEG). A  
463 baseline recording was obtained followed by IAKA injection and continued for one hour.  
464 Mouse EEG data were analyzed and quantified using LabChart 8 software (ADInstruments,  
465 Oxford, U.K.) as described<sup>63</sup>. Seizures were defined as high-amplitude (> 2 x baseline) high-  
466 frequency (> 5 Hz) polyspike discharges lasting > 5 seconds. EEG total power was plotted as  
467 percentage of baseline recording (each animal's EEG power post seizure compared to its own  
468 baseline EEG)<sup>63</sup>. Twenty-four hours after status epilepticus mice were transcardially perfused  
469 and brains sectioned for histopathological analysis of hippocampal damage. Seizure-induced  
470 neuronal damage was analyzed on 12  $\mu$ m coronal sections at the level of medial hippocampus  
471 (AP = -1.70 mm) using Fluoro-Jade B (FJB) (Millipore Ireland B.V.) as described<sup>62</sup>.

472

473

474

475 *In situ hybridization*

476 Non-radioactive in situ hybridization (ISH) was performed as described previously<sup>64</sup>. Except,  
477 hybridization was performed with 10 nM of double-DIG (3' and 5') - labelled locked nucleic  
478 acid (LNA) probes for miR-10a-5p, miR-142a-5p, miR-21a-5p and LNA-DIG Scramble probe  
479 (Exiqon) overnight at 50 °C followed by stringency washes at 55 °C. Four IAKA mice and two  
480 PBS mice with three sections per mouse were used.

481  
482 *Behavioral testing and in vitro assay of effects of anti-miR-10a-5p, anti-miR-21a-5p and anti-*  
483 *miR-142a-5p*

484 Stereotaxic injection for each miRNA knockdown was performed on adult male Sprague  
485 Dawley rats (weight range 270-380 g) as described previously<sup>30</sup>. Briefly, rats were  
486 anaesthetized with isoflurane (5% induction, ~2.5% maintenance) and given metacam (0.2 ml  
487 subcutaneous) prior to beginning surgery, followed by 0.15 ml buprenorphine and 2.5 ml  
488 saline (both subcutaneous) during recovery. We injected 2.5 nmol in 2 ml TE buffer of either  
489 anti-miR-10a-5p, anti-miR-21a-5p and anti-miR-142a-5p or Scr at the following co-ordinates  
490 (relative to bregma): AP -0.92 mm, L +1.3 mm, V 3.3 mm, to target the lateral ventricle.

491 Treatments were blinded throughout all experimental procedures and analysis. Injection rate  
492 was controlled at 200 nL.min<sup>-1</sup> and the needle was left in place for five minutes post-injection,  
493 to minimize backflow through the injection tract. Rats were allowed to recover from surgery  
494 with food and water freely available.

495 For the novel object location (NOL) test, rats were habituated to the behavioral arena (1m x  
496 1m; Tracksys, Nottingham, UK) for five minutes each day over five days. On day six rats  
497 underwent stereotaxic surgery as described above. On day seven, rats completed the NOL  
498 test. Rats were allowed to explore two identical objects for five minutes. After one hour, rats  
499 were returned to the arena with one object moved to a novel location within the arena.

500 Exploration was measured manually and defined as when the nose was within roughly 2 cm

501 of the object, excluding time spent climbing on top of the object. Task performance was  
502 assessed using two measures: D1 ( $T_{\text{novel}} - T_{\text{familiar}}$ ) and discrimination index ( $[(T_{\text{novel}} - T_{\text{familiar}}) /$   
503  $(T_{\text{novel}} + T_{\text{familiar}})]$ ).

504 *Ex vivo* brain slices were prepared between two and four days after surgery, to coincide  
505 with the maximal miRNA silencing effect<sup>30</sup>. Rats were anaesthetized briefly with isoflurane  
506 and heavily with an i.p. injection of sodium pentobarbital, prior to transcardial perfusion with  
507 ice cold oxygenated sucrose ACSF slicing solution (in mM: 205 sucrose, 10 glucose, 26  
508  $\text{NaHCO}_3$ , 1.2  $\text{NaH}_2\text{PO}_4 \cdot \text{H}_2\text{O}$ , 2.5 KCl, 5  $\text{MgCl}_2$ , 0.1  $\text{CaCl}_2$ ). The brain was quickly extracted  
509 and sliced in 350  $\mu\text{m}$  horizontal sections using a Campden 7000 smz slicer (Campden  
510 Instruments, Loughborough, UK). Slices for electrophysiology were held in a submerged  
511 style holding chamber filled with oxygenated recording ACSF (in mM: 125 NaCl, 10 glucose,  
512 26  $\text{NaHCO}_3$ , 1.25  $\text{NaH}_2\text{PO}_4 \cdot \text{H}_2\text{O}$ , 3 KCl, 2  $\text{CaCl}_2$ , 1  $\text{MgCl}_2$ ) and allowed to recover at room  
513 temperature for one hour before recording. Slices for immunohistochemistry were stored in  
514 4% paraformaldehyde (PFA) at this point and processed as outlined below.

515 All slice electrophysiology was performed using a membrane chamber<sup>30</sup> perfused with  
516 oxygenated recording ACSF, heated to 34°C, at a rate of 16  $\text{mL} \cdot \text{min}^{-1}$ . Electrophysiological  
517 data were recorded using an AxoClamp 700B amplifier (Molecular Devices, CA, USA),  
518 digitized at 10 kHz with a Power1401 (Cambridge Electronic Design, Cambridge, UK) and  
519 recorded using Signal software (Cambridge Electronic Design). For extracellular recordings,  
520 we stimulated the Schaffer Collateral pathway with a bipolar stimulating electrode and  
521 recorded the response in CA1 stratum radiatum using a glass microelectrode ( $\sim 5 \text{ M}\Omega$ ) filled  
522 with recording ACSF. Patch clamp recordings used  $\sim 5 \text{ M}\Omega$  glass microelectrodes filled with  
523 intracellular solution (in mM: 135 K-gluconate, 4 KCl, 10 HEPES, 4 Mg-ATP, 0.3 Na-GTP,  
524 10  $\text{Na}_2$ -phosphocreatine; pH 7.3; 290 mOsm). All recordings were made with access  
525 resistance  $< 20 \text{ M}\Omega$  and were rejected if action potentials did not overshoot 0 mV.

526 Slices for immunohistochemistry were fixed for 24 hrs in PFA before washing 3x5 mins in  
527 PBS. Slices were permeabilized for 2 hours at room temperature (RT) in PBS+0.5% triton and  
528 blocked for 1 hour at RT in PBS+3% BSA. Slices were incubated in primary antibodies  
529 overnight at 4 °C and washed again for 3x5 mins in PBS. Secondary antibodies were applied  
530 for 2 hours at RT before a final 3x5mins wash in PBS. Hoechst stain was added for 2 mins  
531 during the final wash. Slices were mounted using Fluoroshield (Sigma) and imaged using a  
532 Zeiss 710 confocal microscope (Carl Zeiss, Cambridge, UK).

533

534 *Bioinformatics – mRNA target identification, miRNA-target interaction (MTI) prioritization,*  
535 *and pathway enrichment analysis*

536 We developed a novel Neo4j graph database that incorporates publicly available datasets of  
537 both predicted and experimentally validated miRNA-target interactions (MTIs). Predicted  
538 MTIs were downloaded from miRDIP V4.1, a database that integrates 30 prediction  
539 algorithms and calculates an MTI confidence score based on statistical inference  
540 [<http://ophid.utoronto.ca/mirDIP/index.jsp#r>]<sup>31</sup>. Experimentally validated MTIs were  
541 downloaded from miRTarBase V7  
542 [<http://mirtarbase.mbc.nctu.edu.tw/php/search.php#target>]<sup>32</sup> and TarBase V7.0  
543 [[http://carolina.imis.athena-](http://carolina.imis.athena-innovation.gr/diana_tools/web/index.php?r=tarbasev8%2Findex)  
544 [innovation.gr/diana\\_tools/web/index.php?r=tarbasev8%2Findex](http://carolina.imis.athena-innovation.gr/diana_tools/web/index.php?r=tarbasev8%2Findex)]<sup>33</sup>. To ensure  
545 interoperability, all miRNA names were translated to miRBase V22 using  
546 miRNAmeConverter [<http://www.systemsmedicineireland.ie/tools/mirna-name-converter/>]<sup>65</sup>  
547 and mRNA names were converted to official gene symbols using Ensembl V91. Non-human  
548 MTIs were excluded to constrain analyses to putative translatable mechanisms. Strict filtering  
549 criteria were devised to prioritize MTIs and reduce the risk of false-positive MTI  
550 identification - predicted MTIs were retained only if their miRDIP-assigned confidence levels



551 were ‘Very High’, while experimentally validated MTIs were excluded if the only form of  
552 validation was high-throughput CLiP experiments performed prior to 2013, as these are  
553 considered less reliable due to poor antibody specificity and RNA contamination<sup>66</sup>. Our  
554 database also incorporates baseline mRNA tissue expression information from the GTEx-EBI  
555 Expression Atlas [<https://www.ebi.ac.uk/gxa/experiments/E-MTAB-5214/Results>] and  
556 transcription factor information from TRRUST V2.0 [<https://www.grnpedia.org/trrust/>],  
557 ENCODE  
558 [<http://amp.pharm.mssm.edu/Harmonizome/dataset/ENCODE+Transcription+Factor+Targets>  
559 ], and ChEA  
560 [<http://amp.pharm.mssm.edu/Harmonizome/dataset/CHEA+Transcription+Factor+Targets>].  
561 mRNAs implicated in epilepsy were identified using an in-house database collating  
562 information from CARPEDB [<http://carpedb.ua.edu/>], epiGAD<sup>67</sup>, Wang *et al*<sup>68</sup> and curated  
563 epilepsy-genes from the Comparative Toxicogenomics Database (CTD) [<http://ctdbase.org/>  
564 (Jan, 2019)].<sup>69</sup>  
565 Pathway analysis was performed on Reactome pathways containing 10-500 genes by applying  
566 the cumulative hypergeometric distribution for p-value comparison<sup>70</sup>. Pathways with  
567 corrected p-values < 0.05 (Benjamini-Hochberg) were considered significantly enriched.  
568  
569 *Proteomic analysis*  
570 Frozen rat hippocampi were resuspended in 200 µl lysis buffer (6M GdmCl, 10mM TCEP, 1×  
571 Complete protease inhibitor cocktail, 1× PhosSTOP inhibitor, 100 mM TEAB, benzonase) and  
572 dounced 30 times with a plastic douncer while kept on ice. Hereafter samples were boiled for  
573 5 min and sonicated on ice using a probe sonicator with 10 sec on/ 10sec off for 2min total.  
574 Samples were then centrifuged at 13000 rpm for 3 min and the supernatant was added  
575 chloroacetamide to a final concentration of 20 mM followed by incubation in the dark for 30

576 min at room temperature (RT). Proteins were then digested adding first LysC and incubating  
577 for 30 min at RT and then diluting 10× using 100 mM TEAB followed by adding trypsin and  
578 incubating over night at 37°C with shaking. Both LysC and trypsin was added in a  
579 LysC/trypsin:protein ratio of 1:100.

580 Samples were centrifuged at 13000 rpm for 5 min and from the supernatant a volume  
581 corresponding to 50 µg peptide was transferred to a new eppendorff tube. Sets of 6 samples  
582 were labelled using the TMTsixplex™ isobaric label reagent. (ThermoFisher Scientific). The  
583 labeling reagent was prepared using the manufactures instructions to first equilibrate to RT,  
584 then dissolving the labeling reagent in 41 µl anhydrous acetonitrile for 5 min with occasional  
585 vortexing and finally centrifuging to gather the solution. The 41 µl labeling reagent was then  
586 added to each sample and incubated for 1 hour at RT. The reaction was quenched by incubating  
587 with 0.76 M lysine for 15 min. After quenching, a small amount was taken out from each  
588 sample, mixed and then tested by mass spectrometry analysis for labeling efficiency and mixing  
589 ratio. Hereafter the remaining samples were mixed in a 1:1 ratio.

590 The Stage-tips for the high-pH reverse phase fractionation was prepared by placing first two C18  
591 disks in a p200 pipette tip, then adding a slurry of C18 beads (ReproSil-Pur, 3 µm, 120 Å) in  
592 methanol to create a layer of ~1 cm of beads and adding one additional C18 disk in the top. The  
593 column was activated and equilibrated by washing one time in 150 µl buffer B (50% buffer A,  
594 50% ACN) and then two times in 150 µl buffer A (20mM Ammonium hydroxide, pH 10). The  
595 labeled peptide sample was adjusted to pH 10 using buffer A and then loaded onto the activated  
596 and equilibrated stage-tip by spinning the sample through the column and collecting the flow-  
597 through. The column was washed 2 times with 150 µl buffer A and the washes were collected  
598 and combined with the flow-through. Next, peptides were eluted stepwise in 17 fractions by  
599 spinning 150 µl of buffer A containing increasing amounts of ACN for each step (3.5%, 4.5%,  
600 6%, 8%, 10%, 10.5%, 11.5%, 13.5%, 15%, 16%, 17.5%, 18.5%, 19.5%, 21%, 27%, 50%, 80%)

601 through the column. After collection, the liquid was evaporated completely in a Concentrator  
602 Plus (Eppendorf) and prepared for MS by resuspending in buffer A\* (2% ACN, 0.1% TFA).  
603 Samples were analyzed using an Easy-nLC system coupled online to a Q Exactive HF mass  
604 spectrometer (Thermo Scientific) equipped with a nanoelectrospray ion source  
605 (Proxeon/Thermo Scientific). The peptides were eluted into the mass spectrometer during a  
606 chromatographic separation from a fused silica column packed in-house with 3  $\mu$ m C18 beads  
607 (Reprosil, Dr. Maisch) using a 120 min gradient of buffer B (80% ACN, 0.5% acetic acid) with  
608 a flow rate of 250 nL/min. The Q Exactive HF was operated in positive ion mode with a top 12  
609 data-dependent acquisition method where ions were fragmented by higher-energy collisional  
610 dissociation (HCD) using a normalized collisional energy (NCE)/ stepped NCE of 28 and 32.  
611 The resolution was set to 60,000 (at 400m/z), with a scan range of 300-1700 m/z and an AGC  
612 target of 3e6 for the MS survey. MS/MS was performed at a scan range of 100 – 2000 m/z using  
613 a resolution of 30,000 (at 400 m/z), an AGC target of 1e5, an intensity threshold of 1e5 and an  
614 isolation window of 1.2 m/z. Further parameters included an exclusion time of 45 sec and a  
615 maximum injection time for survey and MS/MS of 15 ms and 45 ms respectively.

616 Raw data from the LC-MS/MS analysis was processed using the MaxQuant software version  
617 1.5.3.30 with default settings except from the following: In group specific parameters type was  
618 set to Reporter ion MS2 with 6plex TMT as isobaric labels. As variable modifications Oxidation  
619 (M), Acetyl (Protein N-term), and Deamidation (NQ) was added and in global parameters  
620 match between runs was selected. In MaxQuant, peak lists were searched against the rat UniProt  
621 database (including both swiss-prot and TrEMBL) released August 2016 using the build in  
622 search engine Andromeda.

623 Time profiles for each replicate were created by first normalizing to a common time point (day  
624 16) present in each TMT experiment and then re-normalizing to the control. In this way each  
625 replicate time profile included protein ratios at each time point relative to the control.

626 Differential expression was evaluated using a combined limma and rank product test to obtain  
627 q-values for each protein. Volcano plots were created by plotting log<sub>2</sub> average ratios against –  
628 log<sub>10</sub> q-values obtained in the above mentioned limma and rank product test.

629

### 630 *Statistics*

631 For Ago2-seq statistical significance was calculated by one-way ANOVA with FDR  
632 (Benjamini-Hochberg). *In vivo* seizure screening used one-way ANOVA with Bonferroni  
633 post-hoc correction. *Ex vivo* slice experiments used unpaired *t*-test, one-way ANOVA, or  
634 mixed ANOVA, as appropriate. The statistical approach for pathway analysis and proteomics  
635 is detailed above.

636

### 637 *Data availability*

638 Expression data have been submitted to the gene expression omnibus (GEO) under accession  
639 number GSE137473.

640

641

## 642 **Acknowledgements**

643 We thank Lisa Anne Byrne for support with ethics and Anne Færch Nielsen, PhD for careful  
644 editing and suggestions on the manuscript. We would like to thank Nora Kalabrezi and  
645 Christian Siebert for help with EEG evaluation in the PPS model.

646

## 647 **Declaration of Competing Interests**

648 DCH reports US patent No. US 9,803,200 B2 “Inhibition of microRNA-134 for the treatment  
649 of seizure-related disorders and neurologic injuries”.

650

## 651 **Funding**

652 This publication has emanated from research conducted with the financial support of the  
653 European Union’s ‘Seventh Framework’ Programme (FP7) under Grant Agreement no.  
654 602130. Additional support was from Science Foundation Ireland (SFI) under grants  
655 SFI/13/IA/1891 and 12/COEN/18. Additionally, this publication has emanated from research  
656 supported in part by a research grant from Science Foundation Ireland (SFI) under Grant  
657 Number 16/RC/3948 and co-funded under the European Regional Development Fund and by  
658 FutureNeuro industry partners. The funders had no role in study design, data collection and  
659 analysis, decision to publish, or preparation of the manuscript.

660

## 661 **Author contributions**

662 MV, JS and YY performed Ago2 sequencing and statistical analyses. CRR performed *in vivo*  
663 antagomir studies and histological assessments in mice. GM and SS performed antagomir  
664 electrophysiology, behavior studies and immunofluorescent staining in rats. LMH, DP and  
665 JSA performed proteomics. SB, TE, E J-M, BS, FDG, BN, LC, VN generated brain samples.  
666 ASR performed EEG analyses. PFF, FR and DCH conceived and designed the animal studies,

667 SJH, AP, NMCC, JHMP performed bioinformatics analysis, JK designed RNA sequencing  
668 studies. DCH wrote the initial manuscript and all authors contributed and approved the final  
669 manuscript.  
670

## 671 **References**

- 672
- 673 1. Schuele SU, Luders HO. Intractable epilepsy: management and therapeutic alternatives.  
674 *Lancet Neurol* **7**, 514-524 (2008).  
675
- 676 2. Kwan P, Schachter SC, Brodie MJ. Drug-resistant epilepsy. *N Engl J Med* **365**, 919-926  
677 (2011).  
678
- 679 3. Blumcke I, *et al.* Histopathological findings in brain tissue obtained during epilepsy  
680 surgery. *N Engl J Med* **377**, 1648-1656 (2017).  
681
- 682 4. Pitkanen A, Lukasiuk K. Mechanisms of epileptogenesis and potential treatment targets.  
683 *Lancet Neurol* **10**, 173-186 (2011).  
684
- 685 5. Devinsky O, *et al.* Epilepsy. *Nat Rev Dis Primers* **4**, 18024 (2018).  
686
- 687 6. Gorter JA, *et al.* Potential new antiepileptogenic targets indicated by microarray  
688 analysis in a rat model for temporal lobe epilepsy. *J Neurosci* **26**, 11083-11110 (2006).  
689
- 690 7. McClelland S, *et al.* The transcription factor NRSF contributes to epileptogenesis by  
691 selective repression of a subset of target genes. *Elife* **3**, e01267 (2014).  
692
- 693 8. Johnson MR, *et al.* Systems genetics identifies Sestrin 3 as a regulator of a  
694 proconvulsant gene network in human epileptic hippocampus. *Nat Commun* **6**, 6031  
695 (2015).  
696
- 697 9. Srivastava PK, *et al.* A systems-level framework for drug discovery identifies Csf1R as  
698 an anti-epileptic drug target. *Nat Commun* **9**, 3561 (2018).  
699
- 700 10. Kosik KS. The neuronal microRNA system. *Nat Rev Neurosci* **7**, 911-920 (2006).  
701
- 702 11. Schmiedel JM, *et al.* Gene expression. MicroRNA control of protein expression noise.  
703 *Science* **348**, 128-132 (2015).  
704
- 705 12. Bartel DP. Metazoan MicroRNAs. *Cell* **173**, 20-51 (2018).  
706
- 707 13. Ha M, Kim VN. Regulation of microRNA biogenesis. *Nat Rev Mol Cell Biol* **15**, 509-  
708 524 (2014).  
709
- 710 14. Czech B, Hannon GJ. Small RNA sorting: matchmaking for Argonautes. *Nat Rev Genet*  
711 **12**, 19-31 (2011).  
712
- 713 15. Chandradoss SD, Schirle NT, Szczepaniak M, MacRae IJ, Joo C. A dynamic search  
714 process underlies microRNA targeting. *Cell* **162**, 96-107 (2015).  
715
- 716 16. Gebert LFR, MacRae IJ. Regulation of microRNA function in animals. *Nat Rev Mol*  
717 *Cell Biol*, (2018).  
718
- 719 17. Henshall DC, *et al.* MicroRNAs in epilepsy: pathophysiology and clinical utility. *Lancet*  
720 *Neurol* **15**, 1368-1376 (2016).

- 721  
722 18. Brennan GP, Henshall DC. microRNAs in the pathophysiology of epilepsy. *Neurosci*  
723 *Lett* **667**, 47-52 (2018).  
724  
725 19. van Rooij E, Kauppinen S. Development of microRNA therapeutics is coming of age.  
726 *EMBO Mol Med* **6**, 851-864 (2014).  
727  
728 20. Henshall DC. Manipulating microRNAs in murine models: Targeting the multi-  
729 targeting in epilepsy. *Epilepsy Curr* **17**, 43-47 (2017).  
730  
731 21. Kretschmann A, *et al.* Different microRNA profiles in chronic epilepsy versus acute  
732 seizure mouse models. *J Mol Neurosci* **55**, 466-479 (2015).  
733  
734 22. Srivastava PK, *et al.* Meta-analysis of microRNAs dysregulated in the hippocampal  
735 dentate gyrus of animal models of epilepsy. *eNeuro* **4**, (2017).  
736  
737 23. Cava C, Manna I, Gambardella A, Bertoli G, Castiglioni I. Potential Role of miRNAs  
738 as Theranostic Biomarkers of Epilepsy. *Mol Ther Nucleic Acids* **13**, 275-290 (2018).  
739  
740 24. Flores O, Kennedy EM, Skalsky RL, Cullen BR. Differential RISC association of  
741 endogenous human microRNAs predicts their inhibitory potential. *Nucleic Acids Res*  
742 **42**, 4629-4639 (2014).  
743  
744 25. Jimenez-Mateos EM, *et al.* miRNA Expression profile after status epilepticus and  
745 hippocampal neuroprotection by targeting miR-132. *Am J Pathol* **179**, 2519-2532  
746 (2011).  
747  
748 26. Huang Y, Guo J, Wang Q, Chen Y. MicroRNA-132 silencing decreases the spontaneous  
749 recurrent seizures. *Int J Clin Exp Med* **7**, 1639-1649 (2014).  
750  
751 27. Iori V, *et al.* Blockade of the IL-1R1/TLR4 pathway mediates disease-modification  
752 therapeutic effects in a model of acquired epilepsy. *Neurobiol Dis* **99**, 12-23 (2017).  
753  
754 28. Tao H, *et al.* Intranasal Delivery of miR-146a Mimics Delayed Seizure Onset in the  
755 Lithium-Pilocarpine Mouse Model. *Mediators Inflamm* **2017**, 6512620 (2017).  
756  
757 29. Jimenez-Mateos EM, *et al.* Silencing microRNA-134 produces neuroprotective and  
758 prolonged seizure-suppressive effects. *Nat Med* **18**, 1087-1094 (2012).  
759  
760 30. Morris G, Brennan GP, Reschke CR, Henshall DC, Schorge S. Spared CA1 pyramidal  
761 neuron function and hippocampal performance following antisense knockdown of  
762 microRNA-134. *Epilepsia* **in press**, (2018).  
763  
764 31. Tokar T, *et al.* mirDIP 4.1-integrative database of human microRNA target predictions.  
765 *Nucleic Acids Res* **46**, D360-D370 (2018).  
766  
767 32. Chou CH, *et al.* miRTarBase update 2018: a resource for experimentally validated  
768 microRNA-target interactions. *Nucleic Acids Res* **46**, D296-D302 (2018).  
769  
770 33. Karagkouni D, *et al.* DIANA-TarBase v8: a decade-long collection of experimentally



- 771 supported miRNA-gene interactions. *Nucleic Acids Res* **46**, D239-D245 (2018).  
772
- 773 34. Paemka L, *et al.* Seizures are regulated by ubiquitin-specific peptidase 9 X-linked  
774 (USP9X), a de-ubiquitinase. *PLoS Genet* **11**, e1005022 (2015).  
775
- 776 35. Tan CL, *et al.* MicroRNA-128 governs neuronal excitability and motor behavior in  
777 mice. *Science* **342**, 1254-1258 (2013).  
778
- 779 36. Shinohara Y, *et al.* miRNA profiling of bilateral rat hippocampal CA3 by deep  
780 sequencing. *Biochem Biophys Res Commun* **409**, 293-298 (2011).  
781
- 782 37. Sempere LF, Freemantle S, Pitha-Rowe I, Moss E, Dmitrovsky E, Ambros V.  
783 Expression profiling of mammalian microRNAs uncovers a subset of brain-expressed  
784 microRNAs with possible roles in murine and human neuronal differentiation. *Genome*  
785 *Biol* **5**, R13 (2004).  
786
- 787 38. Ludwig N, *et al.* Distribution of miRNA expression across human tissues. *Nucleic Acids*  
788 *Res* **44**, 3865-3877 (2016).  
789
- 790 39. Chang TC, *et al.* Transactivation of miR-34a by p53 broadly influences gene expression  
791 and promotes apoptosis. *Mol Cell* **26**, 745-752 (2007).  
792
- 793 40. Sano T, Reynolds JP, Jimenez-Mateos EM, Matsushima S, Taki W, Henshall DC.  
794 MicroRNA-34a upregulation during seizure-induced neuronal death. *Cell Death Dis* **3**,  
795 e287 (2012).  
796
- 797 41. Hu K, *et al.* Expression profile of microRNAs in rat hippocampus following lithium-  
798 pilocarpine-induced status epilepticus. *Neurosci Lett* **488**, 252-257 (2011).  
799
- 800 42. Bot AM, Debski KJ, Lukasiuk K. Alterations in miRNA levels in the dentate gyrus in  
801 epileptic rats. *PLoS One* **8**, e76051 (2013).  
802
- 803 43. Gorter JA, *et al.* Hippocampal subregion-specific microRNA expression during  
804 epileptogenesis in experimental temporal lobe epilepsy. *Neurobiol Dis* **62**, 508-520  
805 (2014).  
806
- 807 44. Li MM, *et al.* Genome-wide microRNA expression profiles in hippocampus of rats with  
808 chronic temporal lobe epilepsy. *Sci Rep* **4**, 4734 (2014).  
809
- 810 45. Roncon P, *et al.* MicroRNA profiles in hippocampal granule cells and plasma of rats  
811 with pilocarpine-induced epilepsy - comparison with human epileptic samples. *Sci Rep*  
812 **5**, 14143 (2015).  
813
- 814 46. Mooney C, Becker BA, Raoof R, Henshall DC. EpimiRBase: a comprehensive database  
815 of microRNA-epilepsy associations. *Bioinformatics* **32**, 1436-1438 (2016).  
816
- 817 47. Liu XS, *et al.* Identification of miRNomes associated with adult neurogenesis after  
818 stroke using Argonaute 2-based RNA sequencing. *RNA Biol* **14**, 488-499 (2017).  
819
- 820 48. Liou AK, Clark RS, Henshall DC, Yin XM, Chen J. To die or not to die for neurons in

- 821 ischemia, traumatic brain injury and epilepsy: a review on the stress-activated signaling  
822 pathways and apoptotic pathways. *Prog Neurobiol* **69**, 103-142 (2003).  
823
- 824 49. Jimenez-Mateos EM, *et al.* MicroRNA targeting of the P2X7 purinoceptor opposes a  
825 contralateral epileptogenic focus in the hippocampus. *Scientific Reports* **5**, e17486  
826 (2015).  
827
- 828 50. Rajman M, *et al.* A microRNA-129-5p/Rbfox crosstalk coordinates homeostatic  
829 downscaling of excitatory synapses. *EMBO J*, (2017).  
830
- 831 51. Gross C, *et al.* MicroRNA-mediated downregulation of the potassium channel Kv4.2  
832 contributes to seizure onset. *Cell Rep* **17**, 37-45 (2016).  
833
- 834 52. Bencurova P, *et al.* MicroRNA and mesial temporal lobe epilepsy with hippocampal  
835 sclerosis: Whole miRNome profiling of human hippocampus. *Epilepsia* **58**, 1782-1793  
836 (2017).  
837
- 838 53. Miller-Delaney SF, *et al.* Differential DNA methylation profiles of coding and non-  
839 coding genes define hippocampal sclerosis in human temporal lobe epilepsy. *Brain* **138**,  
840 616-631 (2015).  
841
- 842 54. Kan AA, *et al.* Genome-wide microRNA profiling of human temporal lobe epilepsy  
843 identifies modulators of the immune response. *Cell Mol Life Sci* **69**, 3127-3145 (2012).  
844
- 845 55. Janssen HL, *et al.* Treatment of HCV infection by targeting microRNA. *N Engl J Med*  
846 **368**, 1685-1694 (2013).  
847
- 848 56. Tang C, *et al.* Targeting of microRNA-21-5p protects against seizure damage in a kainic  
849 acid-induced status epilepticus model via PTEN-mTOR. *Epilepsy Res* **144**, 34-42  
850 (2018).  
851
- 852 57. Cacheaux LP, *et al.* Transcriptome profiling reveals TGF-beta signaling involvement in  
853 epileptogenesis. *J Neurosci* **29**, 8927-8935 (2009).  
854
- 855 58. Bar-Klein G, *et al.* Losartan prevents acquired epilepsy via TGF-beta signaling  
856 suppression. *Ann Neurol* **75**, 864-875 (2014).  
857
- 858 59. La Rocca G, *et al.* In vivo, Argonaute-bound microRNAs exist predominantly in a  
859 reservoir of low molecular weight complexes not associated with mRNA. *Proc Natl*  
860 *Acad Sci U S A* **112**, 767-772 (2015).  
861
- 862 60. Leshkowitz D, Horn-Saban S, Parmet Y, Feldmesser E. Differences in microRNA  
863 detection levels are technology and sequence dependent. *RNA* **19**, 527-538 (2013).  
864
- 865 61. Norwood BA, *et al.* Classic hippocampal sclerosis and hippocampal-onset epilepsy  
866 produced by a single "cryptic" episode of focal hippocampal excitation in awake rats. *J*  
867 *Comp Neurol* **518**, 3381-3407 (2010).  
868
- 869 62. Mouri G, *et al.* Unilateral hippocampal CA3-predominant damage and short latency  
870 epileptogenesis after intra-amygdala microinjection of kainic acid in mice. *Brain Res*

- 871           **1213**, 140-151 (2008).  
872
- 873   63.   Reschke CR, *et al.* Potent anti-seizure effects of locked nucleic acid antagonists  
874   targeting miR-134 in multiple mouse and rat models of epilepsy. *Mol Thera* **6**, 45-56  
875   (2017).  
876
- 877   64.   Vangoor VR, *et al.* Antagonizing increased miR-135a levels at the chronic stage of  
878   experimental TLE reduces spontaneous recurrent seizures. *J Neurosci*, (2019).  
879
- 880   65.   Haunsberger SJ, Connolly NM, Prehn JH. miRNAConverter: an R/Bioconductor  
881   package for translating mature miRNA names to different miRBase versions.  
882   *Bioinformatics*, (2016).  
883
- 884   66.   Moore MJ, Zhang C, Gantman EC, Mele A, Darnell JC, Darnell RB. Mapping  
885   Argonaute and conventional RNA-binding protein interactions with RNA at single-  
886   nucleotide resolution using HITS-CLIP and CIMS analysis. *Nat Protoc* **9**, 263-293  
887   (2014).  
888
- 889   67.   Tan NC, Berkovic SF. The Epilepsy Genetic Association Database (epiGAD): analysis  
890   of 165 genetic association studies, 1996-2008. *Epilepsia* **51**, 686-689 (2010).  
891
- 892   68.   Wang J, *et al.* Epilepsy-associated genes. *Seizure* **44**, 11-20 (2017).  
893
- 894   69.   Davis AP, *et al.* The Comparative Toxicogenomics Database: update 2019. *Nucleic*  
895   *Acids Res* **47**, D948-D954 (2019).  
896
- 897   70.   Boyle EI, *et al.* GO::TermFinder--open source software for accessing Gene Ontology  
898   information and finding significantly enriched Gene Ontology terms associated with a  
899   list of genes. *Bioinformatics* **20**, 3710-3715 (2004).  
900
- 901
- 902

903 **Figures**

904 **Figure 1**

**A**

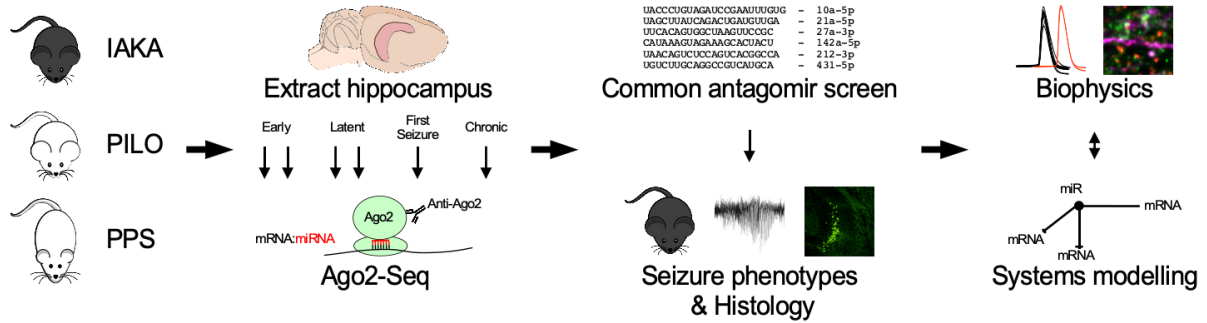

**B**

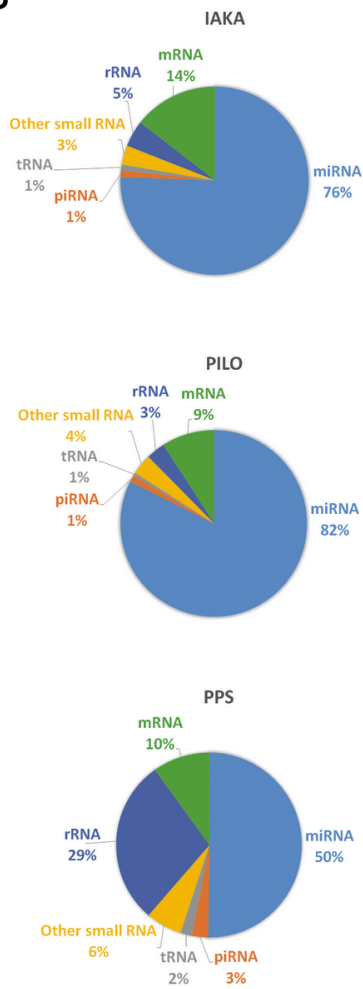

**C**

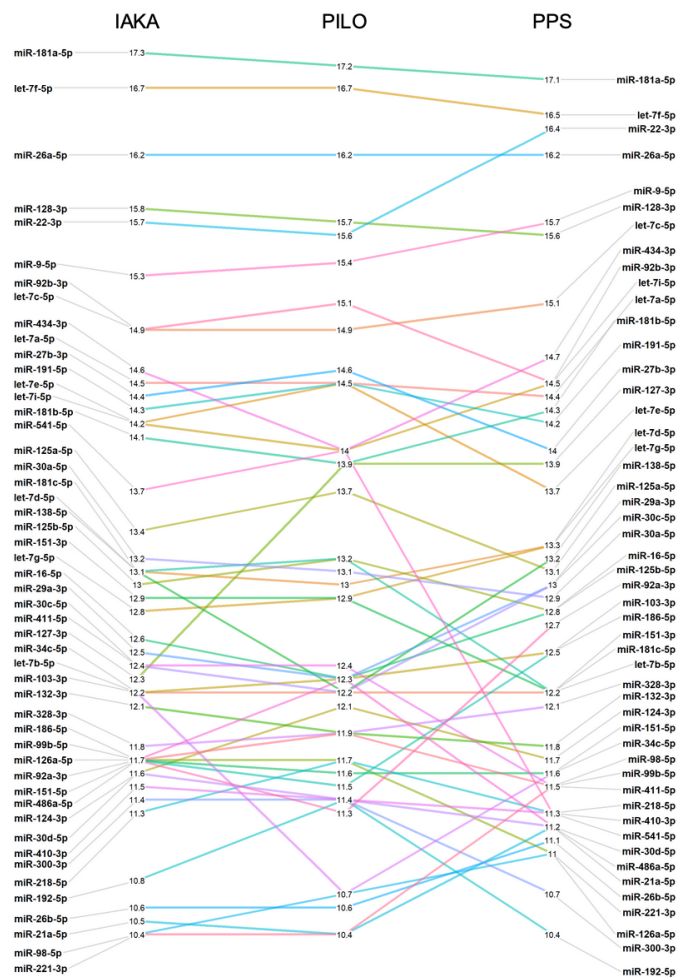

905

906

907 **Figure 2**

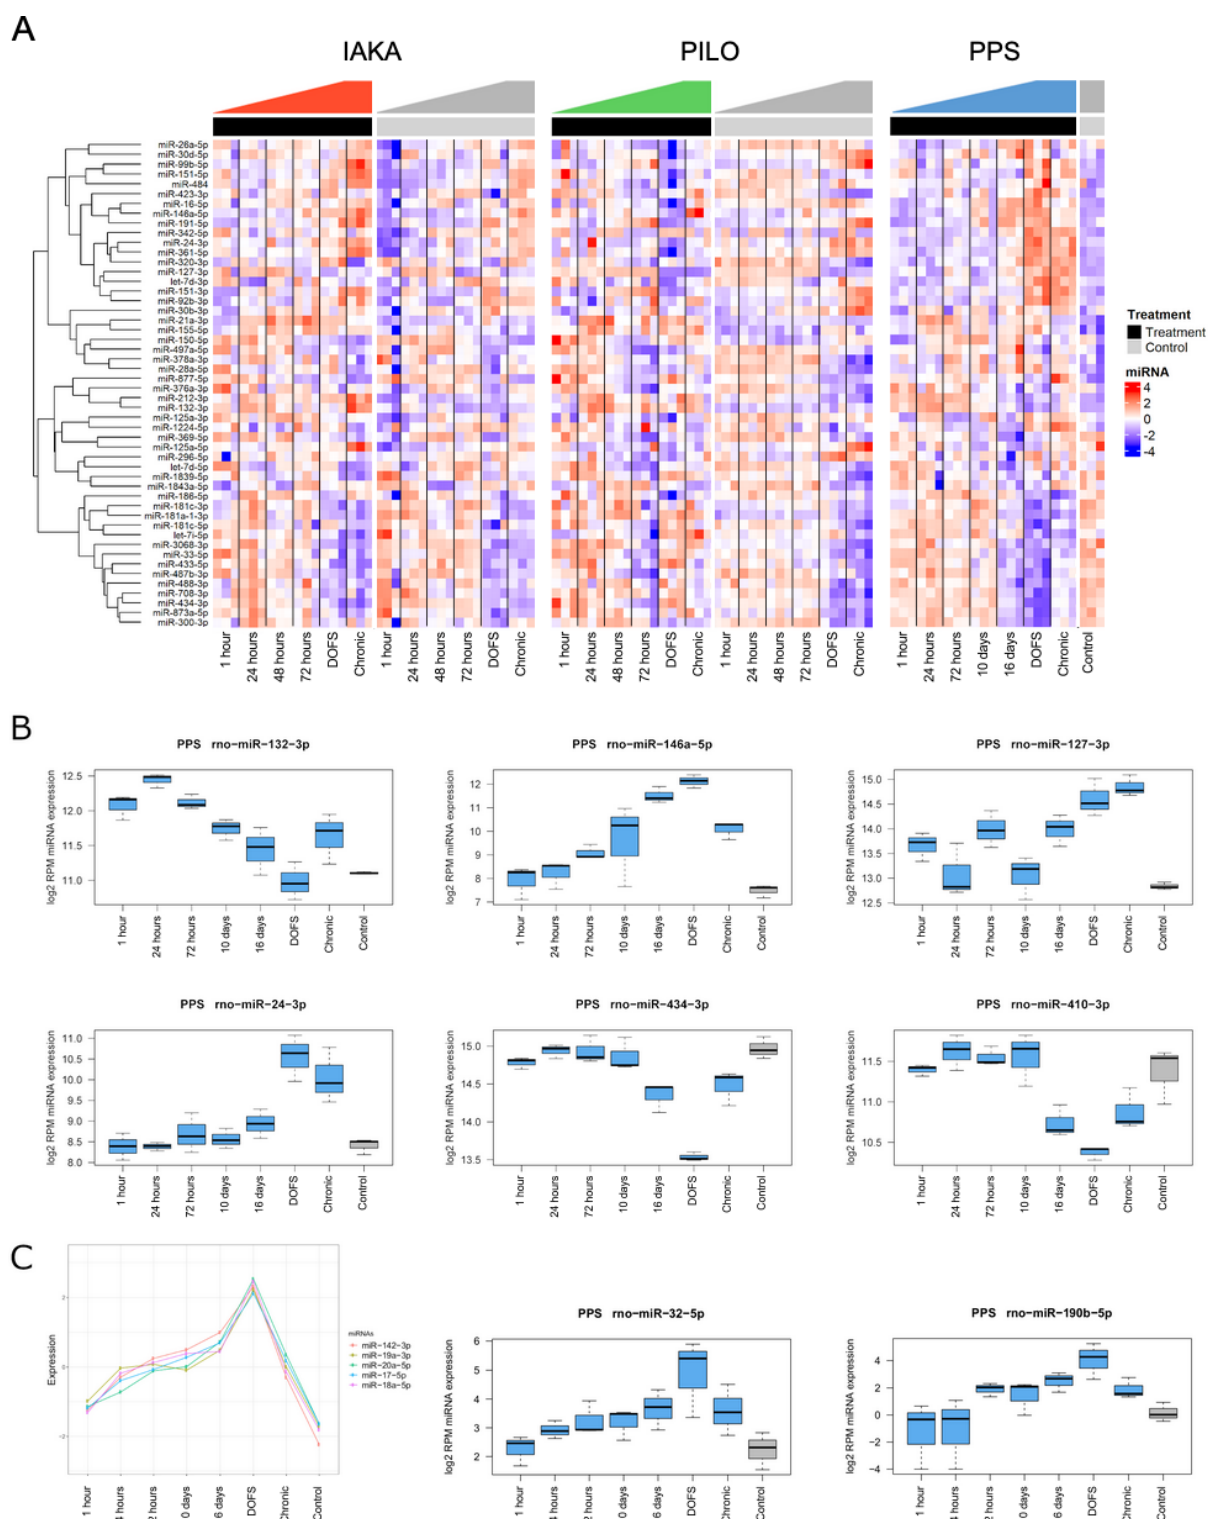

908

909

910 **Figure 3**

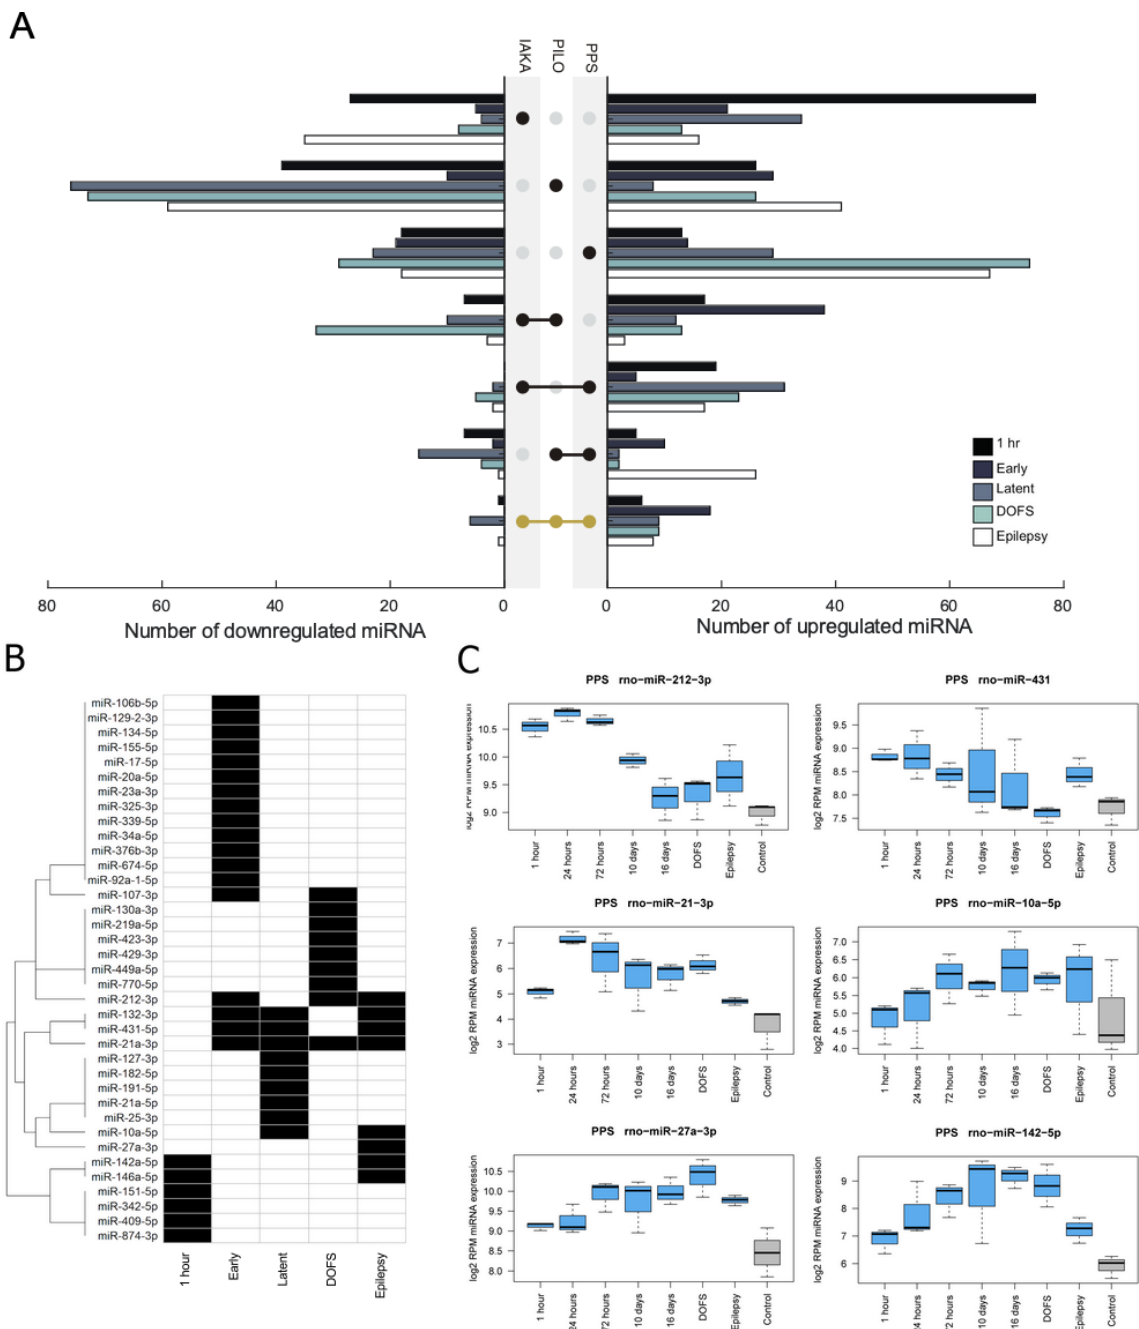

911

912



913 **Figure 4**

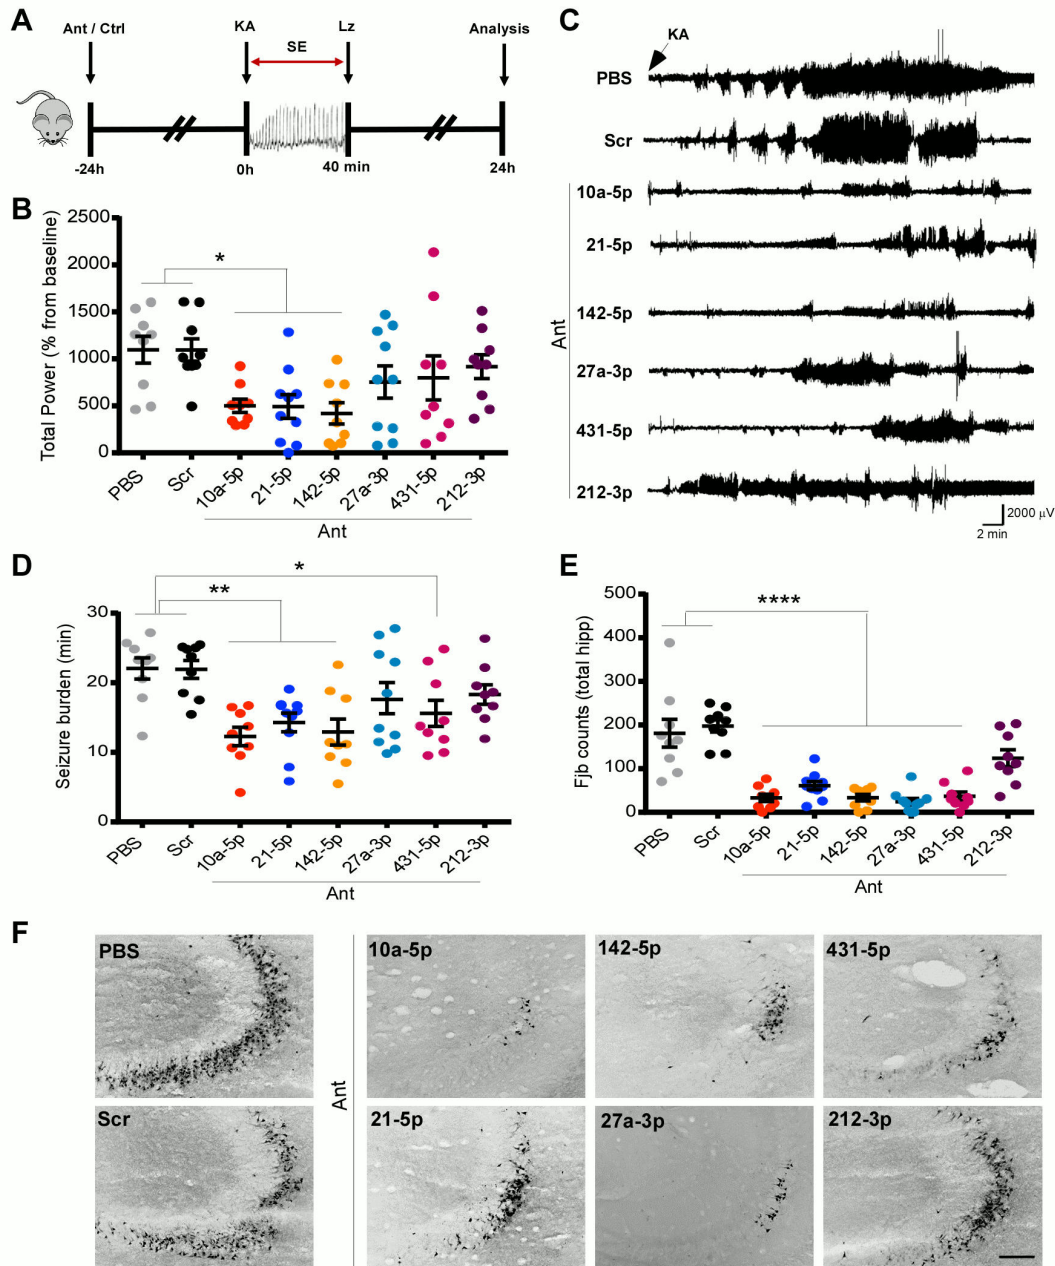

914

915

916 **Figure 5**

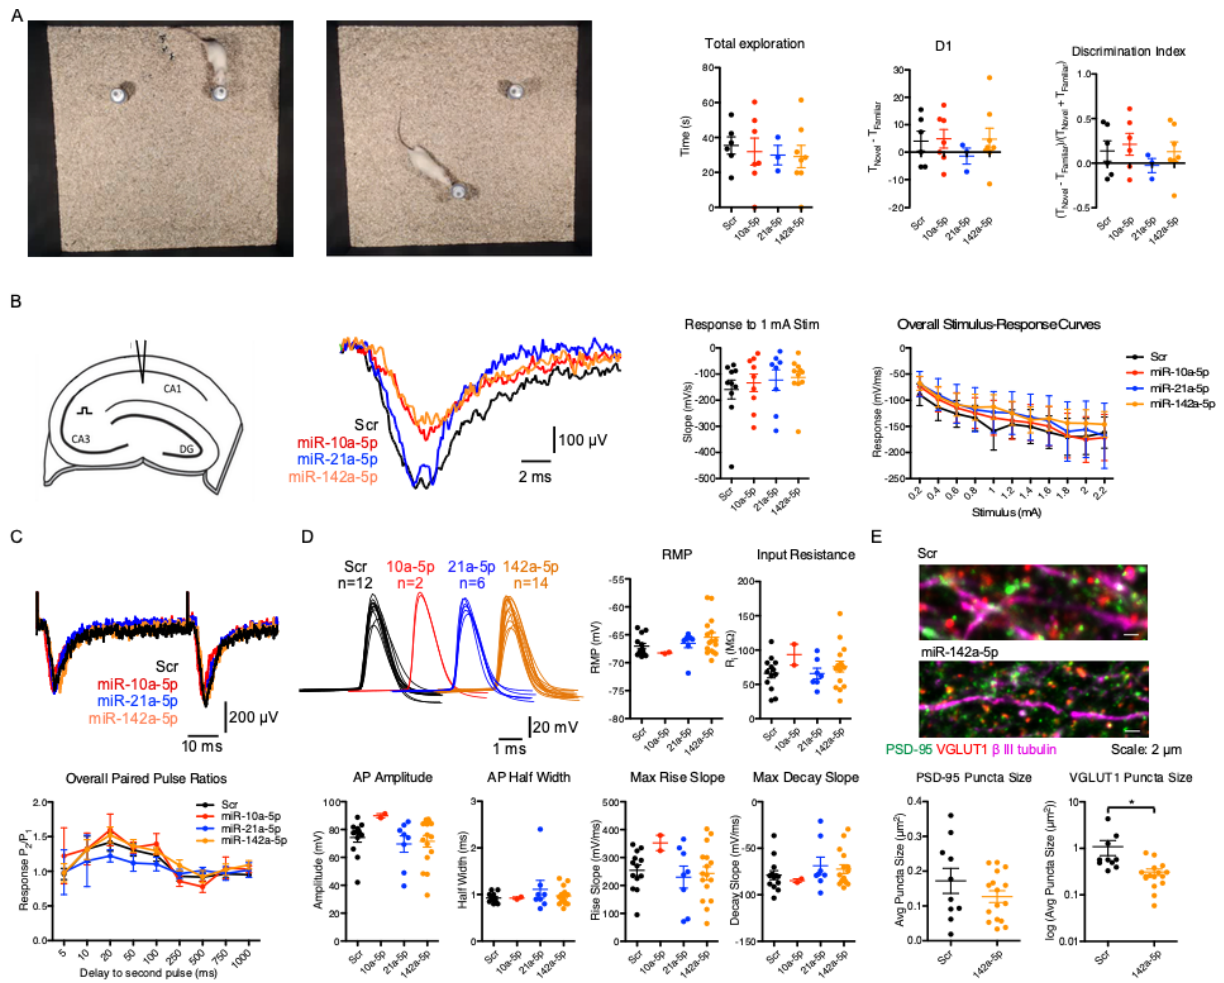

917



918 **Figure 6**

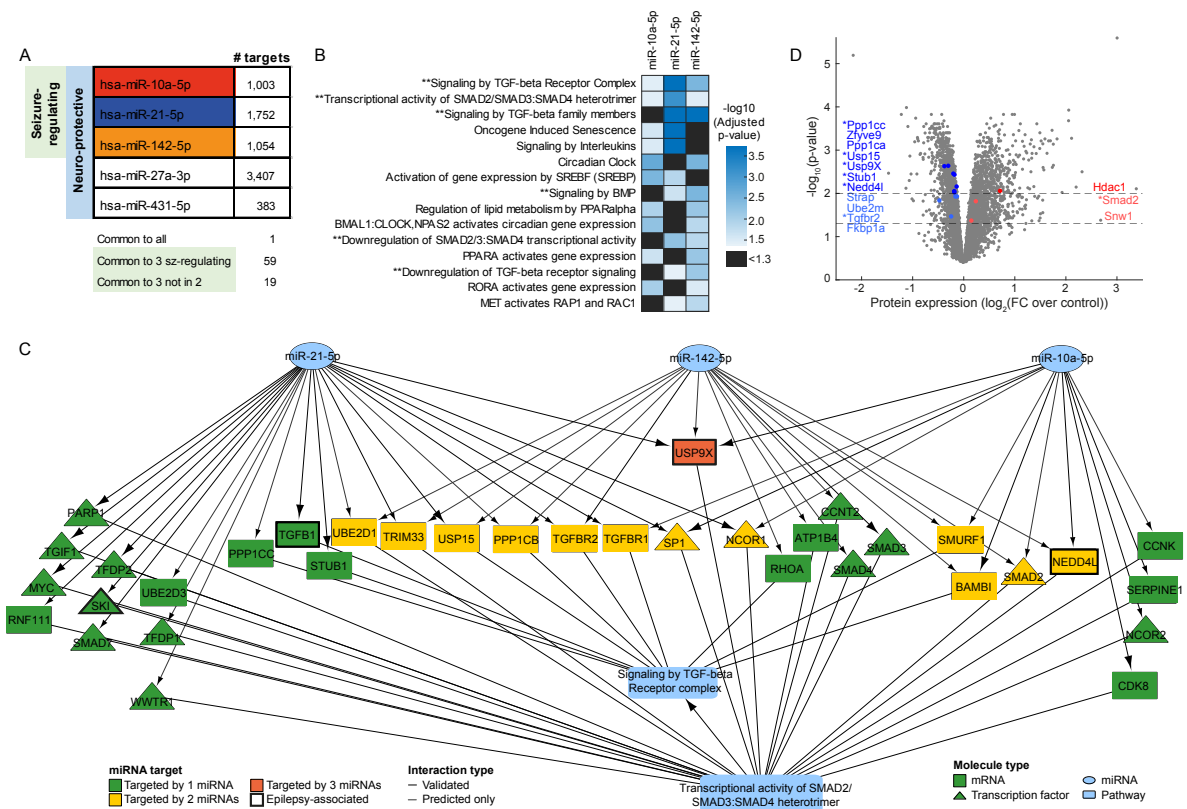

919

920

## 921 **Figure Legends**

### 922 **Figure 1 – Experimental design and small RNA sequencing**

923 *(A)* Schematic showing the full study design. 1) Three rodent models of epilepsy were  
924 generated: IAKA (intraamygdala kainic acid-induced status epilepticus in C57BL/6 mice),  
925 PILO (pilocarpine-induced status epilepticus in NMRI mice) and PPS (perforant pathway  
926 stimulation-induced hippocampal lesioning in Sprague-Dawley rats), 2) Hippocampi were  
927 extracted at six times-points and processed for Ago2 immunoprecipitation and small RNA  
928 sequencing (Ago2-seq). 3) Novel miRNAs with consistent up-regulation in all three models  
929 were selected for antagomir-based screen for anti-seizure phenotypes and neuroprotection. 4)  
930 Pathway modelling and biophysics approaches were used to investigate the function of the  
931 miRNAs. *(B)* The read mapping distribution for the three rodent models. Note, majority of  
932 small RNA reads mapped to miRNAs. *(C)* Expression of the top 50 miRNAs between the three  
933 models showing highly similar expression levels.

934

### 935 **Figure 2 – Extensive dysregulation of Ago2-loaded miRNAs across all phases of epilepsy** 936 **development**

937 *(A)* The 50 most significantly differentially expressed miRNAs are shown as a heatmap  
938 covering all samples from IAKA, PILO and PPS models. Top annotation shows epileptic  
939 animals as black and control animals as grey. Shown are z-scores of log<sub>2</sub> transformed RPM  
940 values. *(B)* Examples of individual miRNA expression responses from the PPS model. Shown  
941 are miR-132 and miR-146 and potential novel epilepsy-associated miRNAs, miR-127, -24, -  
942 434 and -410. *(C)* Clustering analysis shows that miRNAs from the miR-17~92 cluster peak at  
943 DOFS. miR-142-3p also peaks at DOFS, though not transcribed from the miR-17~92 cluster.  
944 Shown are also miR-32-5p and miR-190b-5p, both peaking at DOFS (day of first spontaneous  
945 seizure).

946 **Figure 3 – Identification of common-to-all model miRNAs**

947 *(A)* Graphs show the overlap of up-and down-regulated miRNAs between the three models at  
948 various phases of epilepsy development. *(B)* The miRNAs with consistent up-regulation in all  
949 three models, common-to-all miRNAs, are further highlighted. *(C)* Examples of the expression  
950 data from the PPS model for the common-to-all miRNAs upregulated in chronic epilepsy  
951 (excluding miR-146a-5p and miR-132-3p).

952

953 **Figure 4 – Seizure phenotype screening of antagomirs** *(A)* Schematic shows the

954 experimental design. Briefly, mice were equipped for EEG recordings and underwent ICV  
955 injection of one of six antagomirs targeting miR-10a-5p, miR-21a-5p, miR-142a, miR-27a-3p,  
956 -5p, miR-431-5p, miR-212-3p and or controls (PBS or Scr). After 24 h, status epilepticus (SE)  
957 was induced by IAKA followed by lorazepam (Lz) to reduce mortality and morbidity.  
958 Hippocampal neuronal death was assessed at 24 h after SE. *(B)* Graph shows EEG total power  
959 during status epilepticus as a percentage of each animal's own baseline data. Mice pre-treated  
960 with antagomirs for miR-10a-5p, miR-142a-5p, and miR-21a-5p displayed reduced seizure  
961 severity when compared to PBS or Scramble controls. *(C)* Representative traces show  
962 amplitude ( $\mu\text{V}$ ) of EEG recordings over time (in min; starting from the IAKA injection) for  
963 each group. *(D)* Graph showing seizure burden (time in ictal activity) for each group. *(E)* Graph  
964 and *(F)* representative photomicrographs from the dorsal ipsilateral hippocampus of mice 24 h  
965 after status epilepticus, stained using the irreversible damage marker Fluoro-Jade B (FJB). Scale  
966 bars, 100  $\mu\text{m}$ ). All error bars shown as mean + S.E.M.. n = 9-10 / group; \*P < 0.05, \*\*P<0.01,  
967 \*\*\*P<0.001 compared either to PBS or Scr by One-Way ANOVA.

968

969 **Figure 5 Antagomir effects on behavior and hippocampal biophysics in naïve animals.**  
970 **(A)** Novel object location test - rats explored two identical objects for five minutes (*left*  
971 *image*) and were returned to the same arena after one hour with one object moved to a novel  
972 location (*right image*). Antagomirs did not cause a difference in total exploration time or any  
973 clear effect on absolute preference for the novel object (*D1 scatterplot*) or in discrimination  
974 index. **(B)** Stimulus-response curves - we stimulated the Schaffer collateral pathway in the  
975 hippocampus and recorded the population synaptic response in CA1 stratum radiatum (*left*  
976 *schematic*). Robust responses were observed in all treatment groups (*middle left panel*) and no  
977 significant differences in excitability were seen between groups (*right panels*). **(C)** Paired-  
978 pulse facilitation - we used the same electrode configuration as *(B)* but this time delivered two  
979 pulses (30% maximal response) at varying intervals. Robust facilitation was seen in all groups  
980 (*upper panel* - representative raw data for 50 ms stimulation interval) with no clear  
981 differences between groups (*lower panel*). **(D)** Single cell biophysics - we made current clamp  
982 recordings from CA1 pyramidal neurons and stimulated with a train of hyperpolarizing and  
983 depolarizing current steps. There were no differences in any passive properties (resting  
984 membrane potential (RMP) and input resistance scatterplots) or in properties of the threshold  
985 action potential (*upper left panel* - raw data for all recorded action potentials; lower  
986 scatterplots - properties of threshold action potentials). **(E)** Immunofluorescence for excitatory  
987 synaptic markers - staining for the excitatory pre-synaptic (VGLUT1) and postsynaptic (PSD-  
988 95) showed that ant-142 caused a selective reduction in VGLUT1 puncta size (*lower panel*: \*  
989 - unpaired *t*-test on log-transformed data,  $p = 0.029$ ).  
990

991 **Figure 6: Target identification and pathway enrichment analysis identified TGF $\beta$**   
992 **signaling as a potential convergent mechanism of the seizure-modifying miRNAs.** (A)  
993 Number of mRNAs targeted by each miRNA. 1 mRNA (Thyroid Hormone Receptor Beta;  
994 THRB) is targeted by all 5 miRNA. 59 mRNA are targeted by the three seizure-modifying  
995 miRNAs, 19 of which are not targeted by miR-27a-3p nor miR-431 (see also Table 1). All  
996 targets are listed in Supplementary Data 5. (B) Significantly enriched Reactome pathways for  
997 each of the seizure-modifying miRNAs. \*\* indicates pathways associated with TGF $\beta$   
998 signaling. (C) Wiring diagram depicting mRNA targets of the three seizure-modifying  
999 miRNAs that are involved in the reactome pathways ‘Signaling by TGF-beta receptor  
1000 complex’ and ‘Transcriptional activity of SMAD2/SMAD3:SMAD4 heterotrimer’,  
1001 illustrating the convergence of diverse miRNA targets at the pathway level. (D) Protein  
1002 expression levels (normalized to control) of rat hippocampi isolated at the chronic time-point  
1003 of the PPS model, (FC: foldchange). Proteins above the dashed lines (drawn at  $-\log_{10}(\text{p-}$   
1004  $\text{value}) = 1.3$ , equivalent to  $p = 0.05$  and at  $-\log_{10}(\text{p-value}) = 2$ , equivalent to  $p = 0.01$ ) are  
1005 considered significantly significant. Fold changes are shown on the x-axis with proteins  
1006 involved in the TGF- $\beta$  signaling pathways are highlighted in blue (downregulation) and red  
1007 (upregulation). \* denotes proteins which are targeted by miR-10a-5p, miR-21-5p and/or miR-  
1008 142-5p, as depicted in panel C.  
1009

1010 **Table 1 - mRNAs targeted by all 3 seizure-modifying miRNAs (miR-142a-5p, miR-21a-**  
 1011 **5p, miR-10a-5p).** mRNAs in *black font* are not targeted by miR-27a-3p nor miR-431,  
 1012 indicating that these targets may be specific to the observed seizure-modifying effects. See  
 1013 Supplementary Data 5 for more details. TF: transcription factor.

| Gene           | Gene Name                                                  | Type        | Epilepsy Assoc. |
|----------------|------------------------------------------------------------|-------------|-----------------|
| ACVR2A         | activin A receptor type 2A                                 | Gene        | No              |
| APPBP2         | amyloid beta precursor protein binding protein 2           | Gene        | No              |
| ARHGEF12       | Rho guanine nucleotide exchange factor 12                  | Gene        | No              |
| <b>ARRDC3</b>  | <b>arrestin domain containing 3</b>                        | <b>Gene</b> | <b>No</b>       |
| <b>BNIP2</b>   | <b>BCL2 interacting protein 2</b>                          | <b>Gene</b> | <b>No</b>       |
| CADM1          | cell adhesion molecule 1                                   | Gene        | No              |
| <b>CADM2</b>   | <b>cell adhesion molecule 2</b>                            | <b>Gene</b> | <b>No</b>       |
| <b>CAPRN1</b>  | <b>cell cycle associated protein 1</b>                     | <b>Gene</b> | <b>No</b>       |
| CDK19          | cyclin dependent kinase 19                                 | Gene        | No              |
| CDK6           | cyclin dependent kinase 6                                  | Gene        | No              |
| CELF1          | CUGBP Elav-like family member 1                            | Gene        | No              |
| CEP170         | centrosomal protein 170                                    | Gene        | No              |
| CLCN5          | chloride voltage-gated channel 5                           | Gene        | No              |
| CNOT6          | CCR4-NOT transcription complex subunit 6                   | Gene        | No              |
| CREBL2         | cAMP responsive element binding protein like 2             | Gene        | No              |
| <b>CSDE1</b>   | <b>cold shock domain containing E1</b>                     | <b>Gene</b> | <b>No</b>       |
| <b>DDHD2</b>   | <b>DDHD domain containing 2</b>                            | <b>Gene</b> | <b>No</b>       |
| DLG1           | discs large MAGUK scaffold protein 1                       | Gene        | No              |
| EGR3           | early growth response 3                                    | TF          | Yes             |
| EXOC5          | exocyst complex component 5                                | Gene        | No              |
| FIGN           | fidgetin, microtubule severing factor                      | Gene        | No              |
| FNDC3A         | fibronectin type III domain containing 3A                  | Gene        | No              |
| FOXP1          | forkhead box P1                                            | TF          | No              |
| GATA3          | GATA binding protein 3                                     | TF          | No              |
| HIF1A          | hypoxia inducible factor 1 alpha subunit                   | TF          | No              |
| <b>HSPA8</b>   | <b>heat shock protein family A (Hsp70) member 8</b>        | <b>Gene</b> | <b>No</b>       |
| ITGB8          | integrin subunit beta 8                                    | Gene        | No              |
| KMT2A          | lysine methyltransferase 2A                                | Gene        | Yes             |
| LEMD3          | LEM domain containing 3                                    | Gene        | No              |
| <b>LRP12</b>   | <b>LDL receptor related protein 12</b>                     | <b>Gene</b> | <b>No</b>       |
| LTBP1          | latent transforming growth factor beta binding protein 1   | Gene        | No              |
| <b>MACF1</b>   | <b>microtubule-actin crosslinking factor 1</b>             | <b>Gene</b> | <b>No</b>       |
| <b>MAN1A2</b>  | <b>mannosidase alpha class 1A member 2</b>                 | <b>Gene</b> | <b>No</b>       |
| <b>MAP3K2</b>  | <b>mitogen-activated protein kinase kinase kinase 2</b>    | <b>Gene</b> | <b>No</b>       |
| NFAT5          | nuclear factor of activated T-cells 5                      | TF          | No              |
| ONECUT2        | one cut homeobox 2                                         | TF          | No              |
| <b>PCBP2</b>   | <b>poly(rC) binding protein 2</b>                          | <b>Gene</b> | <b>No</b>       |
| PDLIM5         | PDZ and LIM domain 5                                       | Gene        | No              |
| PSD3           | pleckstrin and Sec7 domain containing 3                    | Gene        | No              |
| <b>PTEN</b>    | <b>phosphatase and tensin homolog</b>                      | <b>Gene</b> | <b>Yes</b>      |
| <b>RPRD1A</b>  | <b>regulation of nuclear pre-mRNA domain containing 1A</b> | <b>Gene</b> | <b>No</b>       |
| RYBP           | RING1 and YY1 binding protein                              | Gene        | No              |
| SERP1          | stress associated endoplasmic reticulum protein 1          | Gene        | No              |
| SERTAD2        | SERTA domain containing 2                                  | Gene        | No              |
| <b>SLC38A2</b> | <b>solute carrier family 38 member 2</b>                   | <b>Gene</b> | <b>No</b>       |
| SLC5A3         | solute carrier family 5 member 3                           | Gene        | No              |

|                |                                                                          |             |           |
|----------------|--------------------------------------------------------------------------|-------------|-----------|
| SMCHD1         | structural maintenance of chromosomes flexible hinge domain containing 1 | Gene        | No        |
| SNTB2          | syntrophin beta 2                                                        | Gene        | No        |
| THRB           | thyroid hormone receptor beta                                            | TF          | Yes       |
| <b>TIAM1</b>   | <b><i>T-cell lymphoma invasion and metastasis 1</i></b>                  | <b>Gene</b> | <b>No</b> |
| <b>TMEM245</b> | <b><i>transmembrane protein 245</i></b>                                  | <b>Gene</b> | <b>No</b> |
| TRIM2          | tripartite motif containing 2                                            | Gene        | No        |
| UBE2K          | ubiquitin conjugating enzyme E2 K                                        | Gene        | No        |
| UBN2           | ubiquitin 2                                                              | Gene        | No        |
| <b>USP34</b>   | <b><i>ubiquitin specific peptidase 34</i></b>                            | <b>Gene</b> | <b>No</b> |
| USP9X          | ubiquitin specific peptidase 9, X-linked                                 | Gene        | Yes       |
| WDR26          | WD repeat domain 26                                                      | Gene        | No        |
| <b>ZBTB8A</b>  | <b><i>zinc finger and BTB domain containing 8A</i></b>                   | <b>Gene</b> | <b>No</b> |
| ZDHHC17        | zinc finger DHHC-type containing 17                                      | Gene        | No        |

1014

1015

1016 **Table 2 - mRNAs targeted by >1 seizure-modifying miRNA (miR-142a-5p, miR-21a-5p,**  
 1017 **miR-10a-5p) that have previously been associated with epilepsy. See Supplementary Data**  
 1018 **5 for more details. TF: transcription factor**

| gene     | geneName                                                                                            | type | targeting miRNAs     |
|----------|-----------------------------------------------------------------------------------------------------|------|----------------------|
| ACTG1    | actin gamma 1                                                                                       | Gene | 142-5p, 10-5p        |
| BRWD3    | bromodomain and WD repeat domain containing 3                                                       | Gene | 142-5p, 21-5p        |
| CAMTA1   | calmodulin binding transcription activator 1                                                        | Gene | 142-5p, 21-5p        |
| CHL1     | cell adhesion molecule L1 like                                                                      | Gene | 10-5p, 21-5p         |
| DLG2     | discs large MAGUK scaffold protein 2                                                                | Gene | 142-5p, 21-5p        |
| DMD      | dystrophin                                                                                          | Gene | 142-5p, 21-5p        |
| DPYSL2   | dihydropyrimidinase like 2                                                                          | Gene | 10-5p, 21-5p         |
| EGR3     | early growth response 3                                                                             | TF   | 142-5p, 10-5p, 21-5p |
| FBXO28   | F-box protein 28                                                                                    | Gene | 10-5p, 21-5p         |
| FMR1     | fragile X mental retardation 1                                                                      | Gene | 142-5p, 21-5p        |
| GABRB2   | gamma-aminobutyric acid type A receptor beta2 subunit                                               | Gene | 10-5p, 21-5p         |
| GATAD2B  | GATA zinc finger domain containing 2B                                                               | Gene | 10-5p, 21-5p         |
| HS2ST1   | heparan sulfate 2-O-sulfotransferase 1                                                              | Gene | 142-5p, 21-5p        |
| KCNA1    | potassium voltage-gated channel subfamily A member 1                                                | Gene | 10-5p, 21-5p         |
| KCNJ10   | potassium voltage-gated channel subfamily J member 10                                               | Gene | 142-5p, 21-5p        |
| KMT2A    | lysine methyltransferase 2A                                                                         | Gene | 142-5p, 10-5p, 21-5p |
| KRIT1    | KRIT1, ankyrin repeat containing                                                                    | Gene | 142-5p, 21-5p        |
| MBD5     | methyl-CpG binding domain protein 5                                                                 | Gene | 142-5p, 10-5p        |
| MYT1L    | myelin transcription factor 1 like                                                                  | Gene | 142-5p, 10-5p        |
| NEDD4L   | neural precursor cell expressed, developmentally down-regulated 4-like, E3 ubiquitin protein ligase | Gene | 142-5p, 10-5p        |
| NF1      | neurofibromin 1                                                                                     | TF   | 10-5p, 21-5p         |
| NIN      | ninein                                                                                              | Gene | 142-5p, 21-5p        |
| NSD2     | nuclear receptor binding SET domain protein 2                                                       | TF   | 10-5p, 21-5p         |
| PAFAH1B1 | platelet activating factor acetylhydrolase 1b regulatory subunit 1                                  | Gene | 10-5p, 21-5p         |
| PLD1     | phospholipase D1                                                                                    | Gene | 142-5p, 21-5p        |
| PLP1     | proteolipid protein 1                                                                               | Gene | 10-5p, 21-5p         |
| PTEN     | phosphatase and tensin homolog                                                                      | Gene | 142-5p, 10-5p, 21-5p |
| PTGS2    | prostaglandin-endoperoxide synthase 2                                                               | Gene | 10-5p, 21-5p         |
| PURA     | purine rich element binding protein A                                                               | TF   | 142-5p, 21-5p        |
| RNF213   | ring finger protein 213                                                                             | Gene | 10-5p, 21-5p         |
| SCARB2   | scavenger receptor class B member 2                                                                 | Gene | 10-5p, 21-5p         |
| SCN3A    | sodium voltage-gated channel alpha subunit 3                                                        | Gene | 142-5p, 10-5p        |
| SETD2    | SET domain containing 2                                                                             | Gene | 142-5p, 21-5p        |
| SLC7A11  | solute carrier family 7 member 11                                                                   | Gene | 142-5p, 10-5p        |
| SLC9A6   | solute carrier family 9 member A6                                                                   | Gene | 142-5p, 21-5p        |
| SMC1A    | structural maintenance of chromosomes 1A                                                            | Gene | 10-5p, 21-5p         |
| SON      | SON DNA binding protein                                                                             | Gene | 142-5p, 10-5p        |
| SOX5     | SRY-box 5                                                                                           | TF   | 142-5p, 21-5p        |
| SPTAN1   | spectrin alpha, non-erythrocytic 1                                                                  | Gene | 10-5p, 21-5p         |
| SYNJ1    | synaptojanin 1                                                                                      | Gene | 142-5p, 10-5p        |
| SYT14    | synaptotagmin 14                                                                                    | Gene | 142-5p, 21-5p        |
| TCF4     | transcription factor 4                                                                              | TF   | 142-5p, 21-5p        |
| THRB     | thyroid hormone receptor beta                                                                       | TF   | 142-5p, 10-5p, 21-5p |
| UBR5     | ubiquitin protein ligase E3 component n-recognin 5                                                  | Gene | 142-5p, 21-5p        |
| USP9X    | ubiquitin specific peptidase 9, X-linked                                                            | Gene | 142-5p, 10-5p, 21-5p |
| UTRN     | utrophin                                                                                            | Gene | 142-5p, 21-5p        |
| VDAC1    | voltage dependent anion channel 1                                                                   | Gene | 10-5p, 21-5p         |
| ZMYND11  | zinc finger MYND-type containing 11                                                                 | TF   | 10-5p, 21-5p         |



1019 **Supplementary Data 1 - Summary of EEG data for IAKA, PILO and PPS models**

**Animals sampled on day of first seizure**

| Animal ID      | Species            | Model | Latency to 1st Sz | No of Sz before hippocampus extracted | Time between final Sz and hippocampus extracted |
|----------------|--------------------|-------|-------------------|---------------------------------------|-------------------------------------------------|
| RMK_DOFS_RH_85 | C57BL/6 mouse      | IAKA  | 73 hrs            | 2                                     | 4 hrs                                           |
| RMK_DOFS_RH_94 | C57BL/6 mouse      | IAKA  | 81 hrs            | 1                                     | 4.5 hrs                                         |
| RMK_DOFS_RH_95 | C57BL/6 mouse      | IAKA  | 73 hrs            | 3                                     | 3.5 hrs                                         |
| MRP07_RH_64    | Sprague Dawley rat | PPS   | 33 days           | 8                                     | 17 hrs                                          |
| MRP07_RH_69    | Sprague Dawley rat | PPS   | 12 days           | 1                                     | 30.5 hrs                                        |
| MRP07_RH_74    | Sprague Dawley rat | PPS   | 19 days           | 1                                     | -                                               |
| VMP_DOFS_LH_1  | NMRI mouse         | PILO  | 86 hrs            | 9                                     | 19 mins                                         |
| VMP_DOFS_LH_2  | NMRI mouse         | PILO  | 47 hrs            | 1                                     | 19 hrs                                          |
| VMP_DOFS_LH_3  | NMRI mouse         | PILO  | 36 hrs            | 1                                     | 10.5 hrs                                        |

1020

1021

**Animals sampled in chronic epilepsy**

| Animal ID    | Species       | Model | Latency to 1st Sz | Total no of Sz | Total time in Sz | No of Sz in final 24 hrs | Time in Sz in last 24 hrs | Time between final Sz and hippocampus extracted |
|--------------|---------------|-------|-------------------|----------------|------------------|--------------------------|---------------------------|-------------------------------------------------|
| RMK2W_RH_76  | C57BL/6 mouse | IAKA  | 7 days            | 25             | 502s             | 0                        | 0                         | 72 hours                                        |
| RMK2W_RH_101 | C57BL/6 mouse | IAKA  | 3 days            | 108            | 2014s            | 11                       | 229s                      | 4 hours                                         |
| RMK2W_RH_106 | C57BL/6 mouse | IAKA  | 3 days            | 74             | 944s             | 10                       | 109.25s                   | 4 hours                                         |
| MRP07_RH_37  | SD rat        | PPS   | 27 days           | 4              | 161.7            | 0                        | 0                         | 101 hours                                       |
| MRP07_RH_43  | SD rat        | PPS   | 11 days           | 3              | 304              | 0                        | 0                         | 82 hours                                        |
| MRP07_RH_75  | SD rat        | PPS   | 13 days           | 9              | 318.4            | 0                        | 0                         | 135 hours                                       |
| VMP4W_LH_1   | NMRI mouse    | PILO  | 88 hrs            | -              | -                | -                        | -                         | -                                               |
| VMP4W_LH_2   | NMRI mouse    | PILO  | 135 hrs           | -              | -                | -                        | -                         | -                                               |
| VMP4W_LH_3   | NMRI mouse    | PILO  | 17 days           | -              | -                | -                        | -                         | -                                               |

1022

1023 - : Data is unavailable

1024

1025 **Supplementary Data 2 - Summary of Ago2-seq reads**

**RNA species detected in Ago2 small RNA sequencing**

---

| <b>RNA species</b> | <b>IAKA</b> | <b>PILO</b> | <b>PPS</b> |
|--------------------|-------------|-------------|------------|
| miRNA              | 75.5%       | 82.4%       | 50.2%      |
| piRNA              | 1.2%        | 1.2%        | 2.8%       |
| tRNA               | 1.0%        | 0.5%        | 2.0%       |
| Other small RNA*   | 3.3%        | 3.6%        | 6.3%       |
| rRNA               | 4.5%        | 3.2%        | 28.8%      |
| mRNA               | 14.4%       | 9.1%        | 9.9%       |

---

1026

1027 \* Other small RNA refers to snoRNA, snRNA, yRNA, and small RNAs from Rfam

1028 (<https://rfam.xfam.org/>)

1029

1030 **Supplementary Data 3 -Expression of miRNAs in three rodent epilepsy models**

1031

1032 This is too large to show here. A separate excel file has been generated.

1033

1034 **Supplementary Data 4 - MiRNA-Target Interactions for each miRNA, along with brain**  
1035 **expression information for each target**

1036 This is too large to show here. A separate excel file has been generated.

1037

1038 **Supplementary Data 5 - In situ hybridization for anti-seizure miRs**  
1039

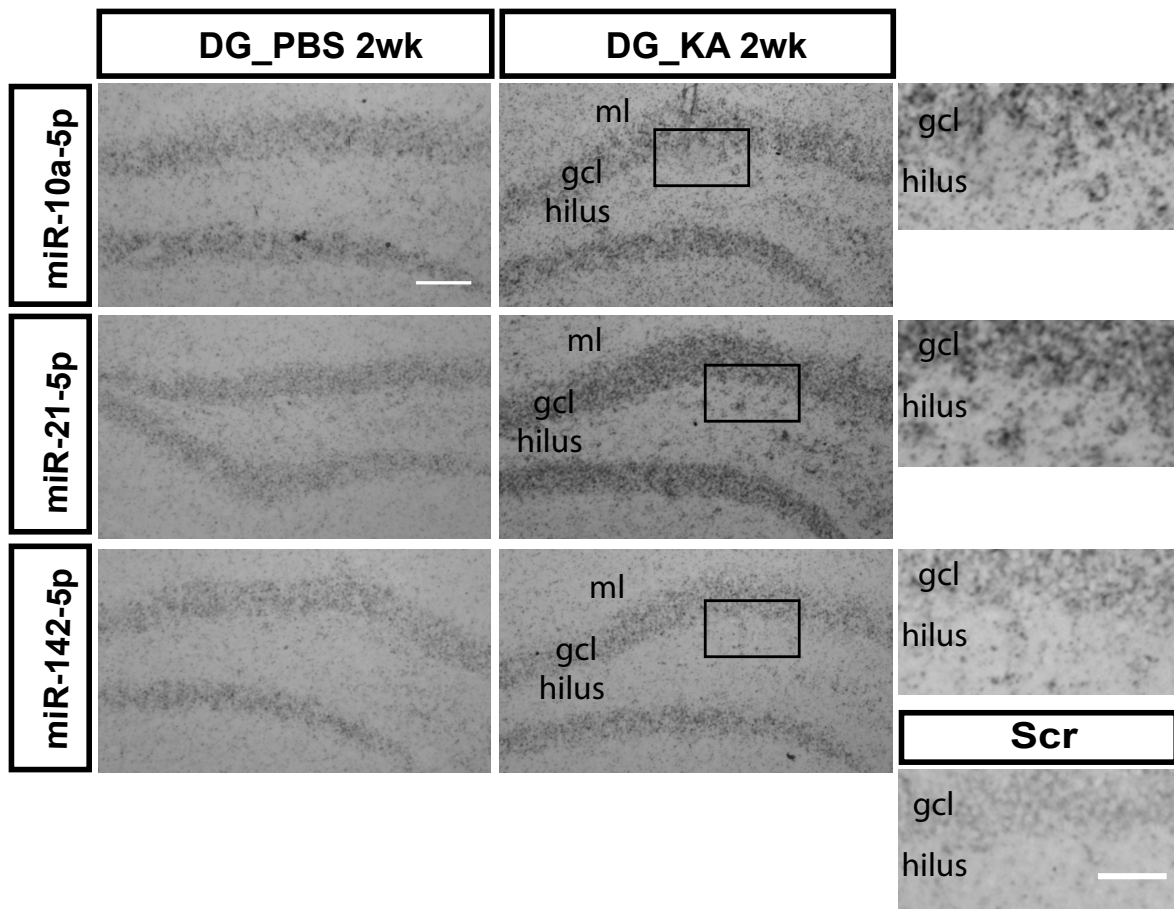

1040  
1041

1042 miRNA expression validation and cellular localization by *in situ* hybridization in IAKA mice  
1043 at 2 weeks after injection. Low magnification images (main panels) show whole dentate gyrus  
1044 (scale: 100  $\mu$ m; scale for insets: 50  $\mu$ m). All three miRs show stronger expression in KA  
1045 injected mice compared to PBS injected mice.

1046
